# Supplementary material
Source: publisher figshare collection journal article supplement (https://tandf.figshare.com/ndownloader/files/42771543)

**Supplementary Materials**

**Antibacterial activities of isolated compounds from *Allophylus spicatus* (POIR.) RADLK (Sapindacea)**

**ABSTRACT**

Phytochemical investigation on the roots of *Allophylus spicatus* (Sapindacea)led to the isolation of four compounds, namely Cleomiscosin A (**1**), Cleomiscosin C (**2**), Scopoletin (**3**) and 3-oxotirucalla-7,24-dien-24-oic acid (**4**). The structures of the compounds were established by spectroscopic analysis: UV, IR, 1D and 2D NMR, EI-MS and HR-EI-MS and compared with literature. These compounds are reported for the first time from the plant. The compounds showed potent antibacterial activities, marked inhibition against most the tested bacterial strains with a zone of inhibition between 0.7±0.35 **-** 16±0.46 mm as compared with the zone of inhibition of Streptomycin (20±0.34 - 31±0.29 mm), a known antibacterial drug used as the standard. The antibacterial activities of the isolated phytochemicals could be responsible for the plant ethno-medicinal uses.

Keywords: *Allophylus spicatus*, Sapindacea, Isolation, Phytochemical, antibacterial activities

Fig. S1: 1H-NMR (CDCl3+ CD3OD, 500MHz) spectrum of compound 1 (Cleomiscosin A)


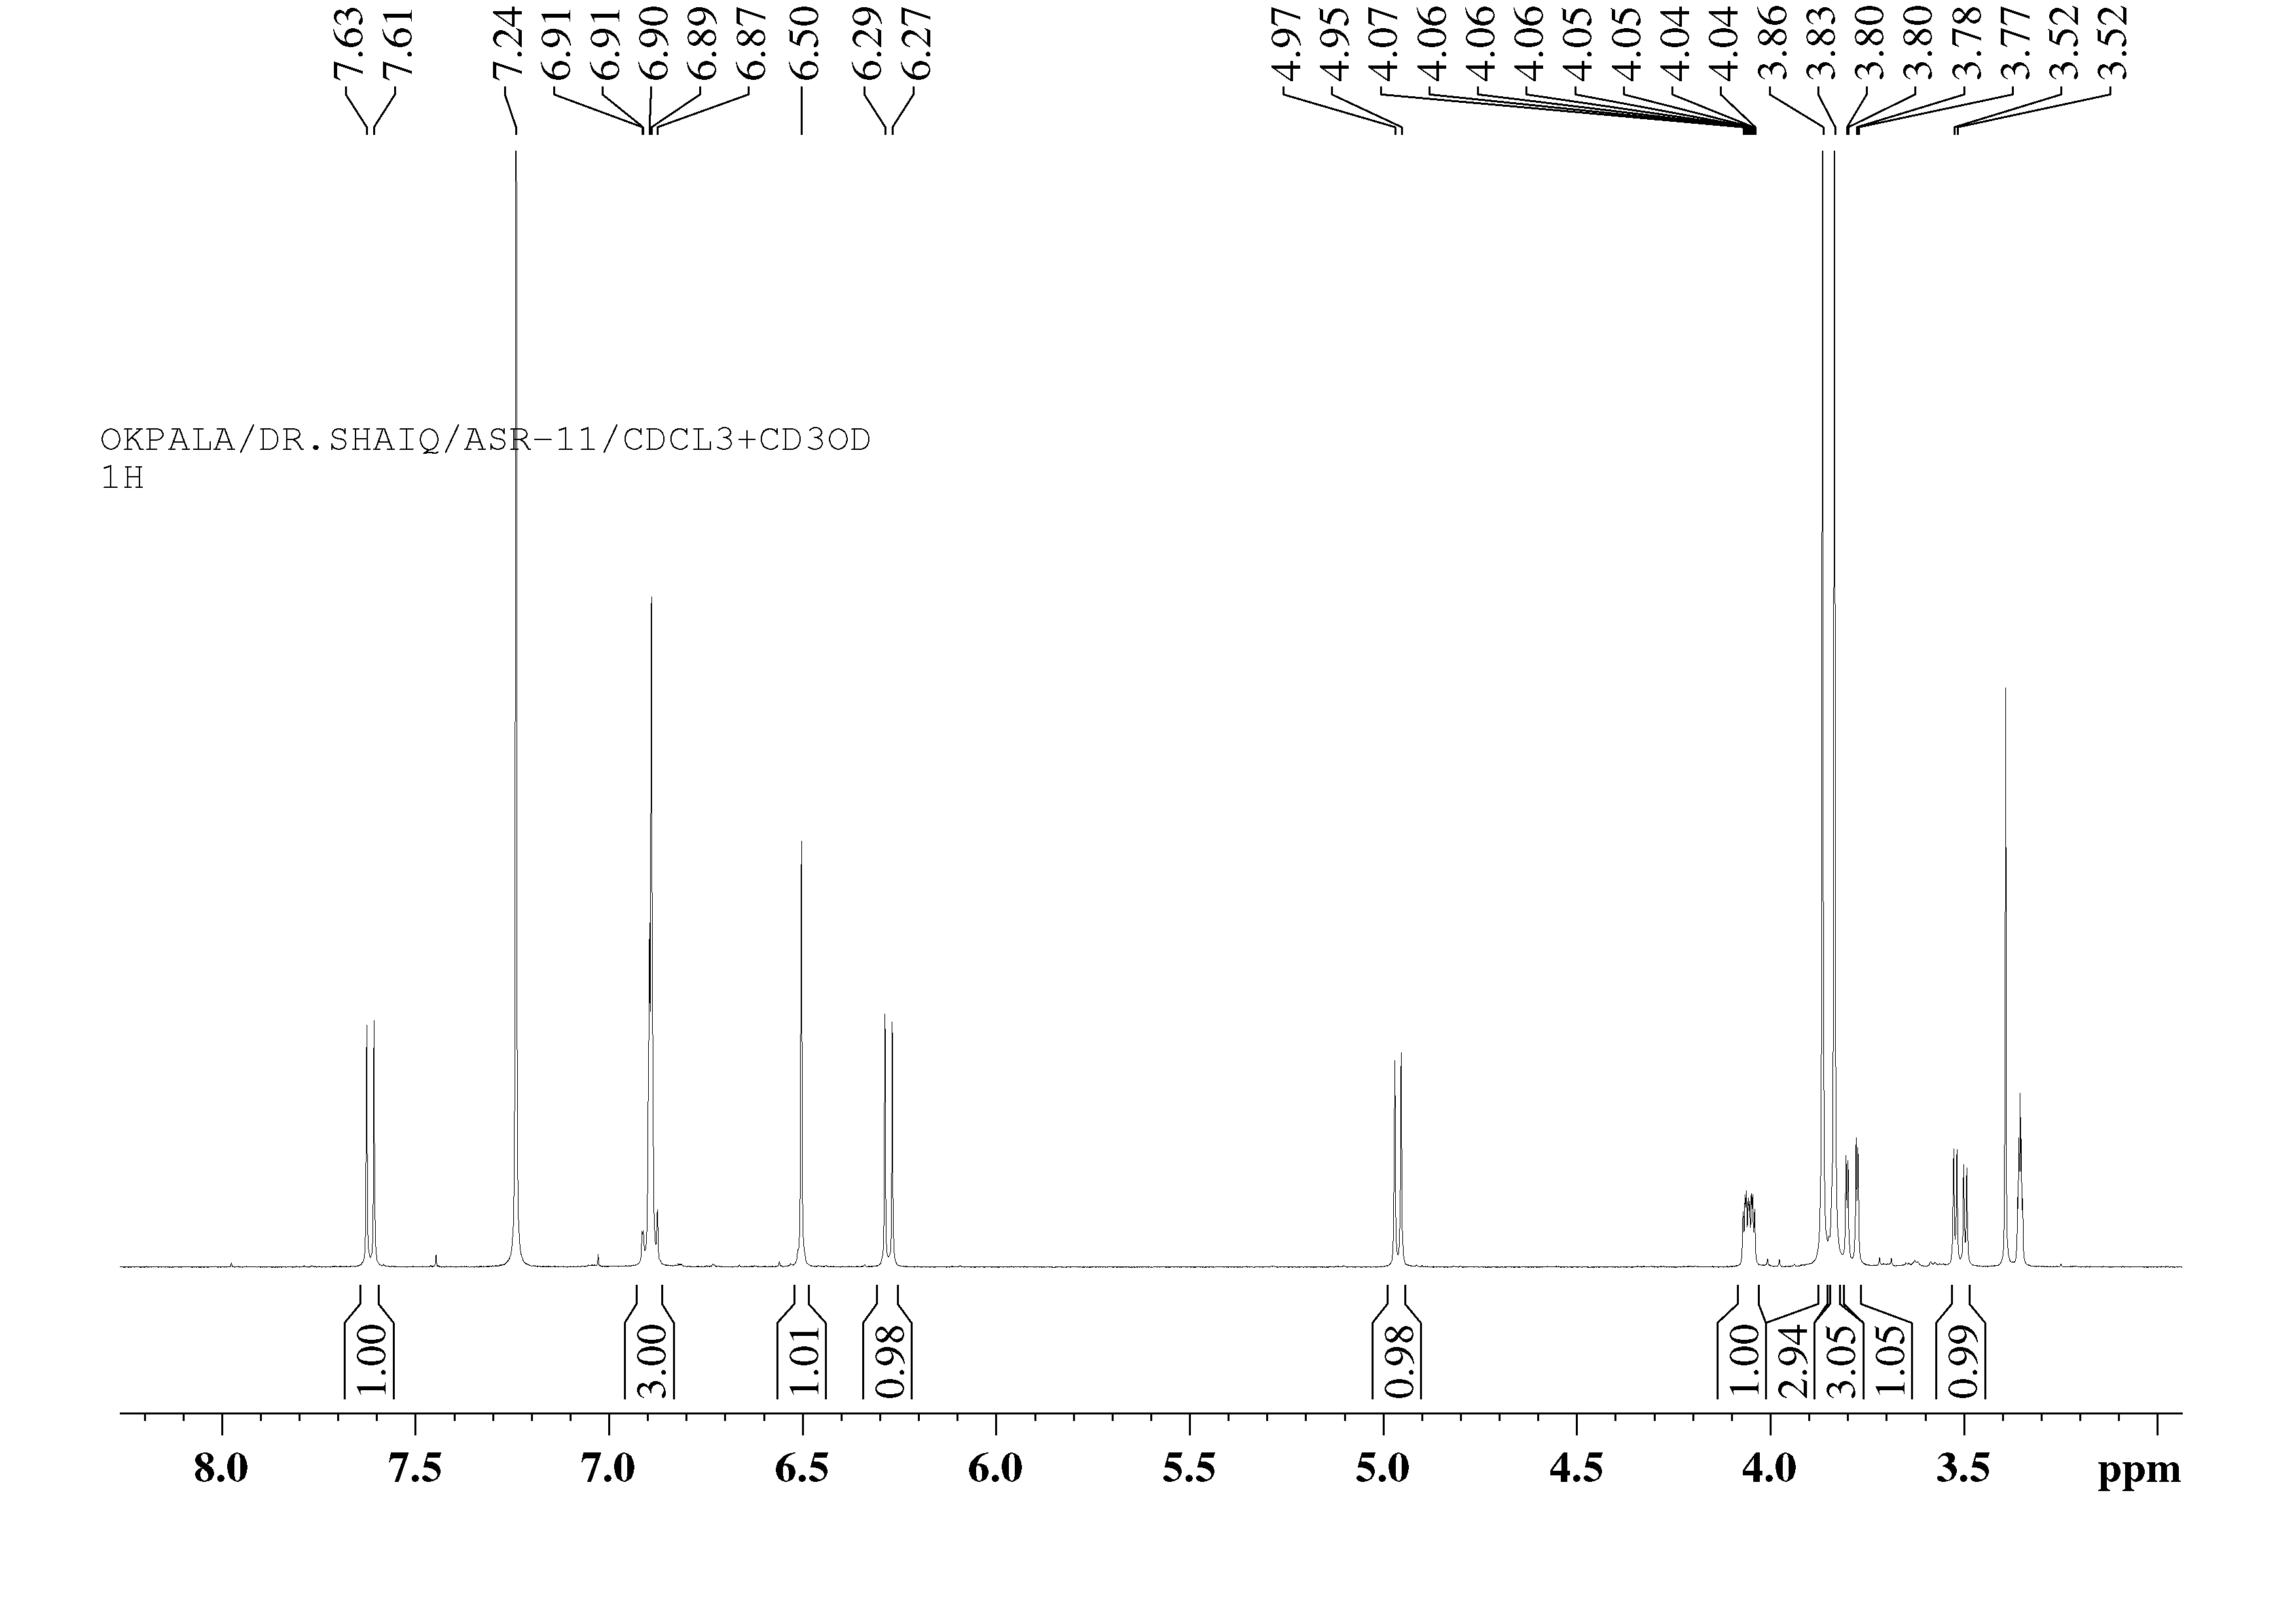


Fig. S2: 13C-NMR (CDCl3+ CD3OD, 150MHz) spectrum of compound 1 (Cleomiscosin A)

**
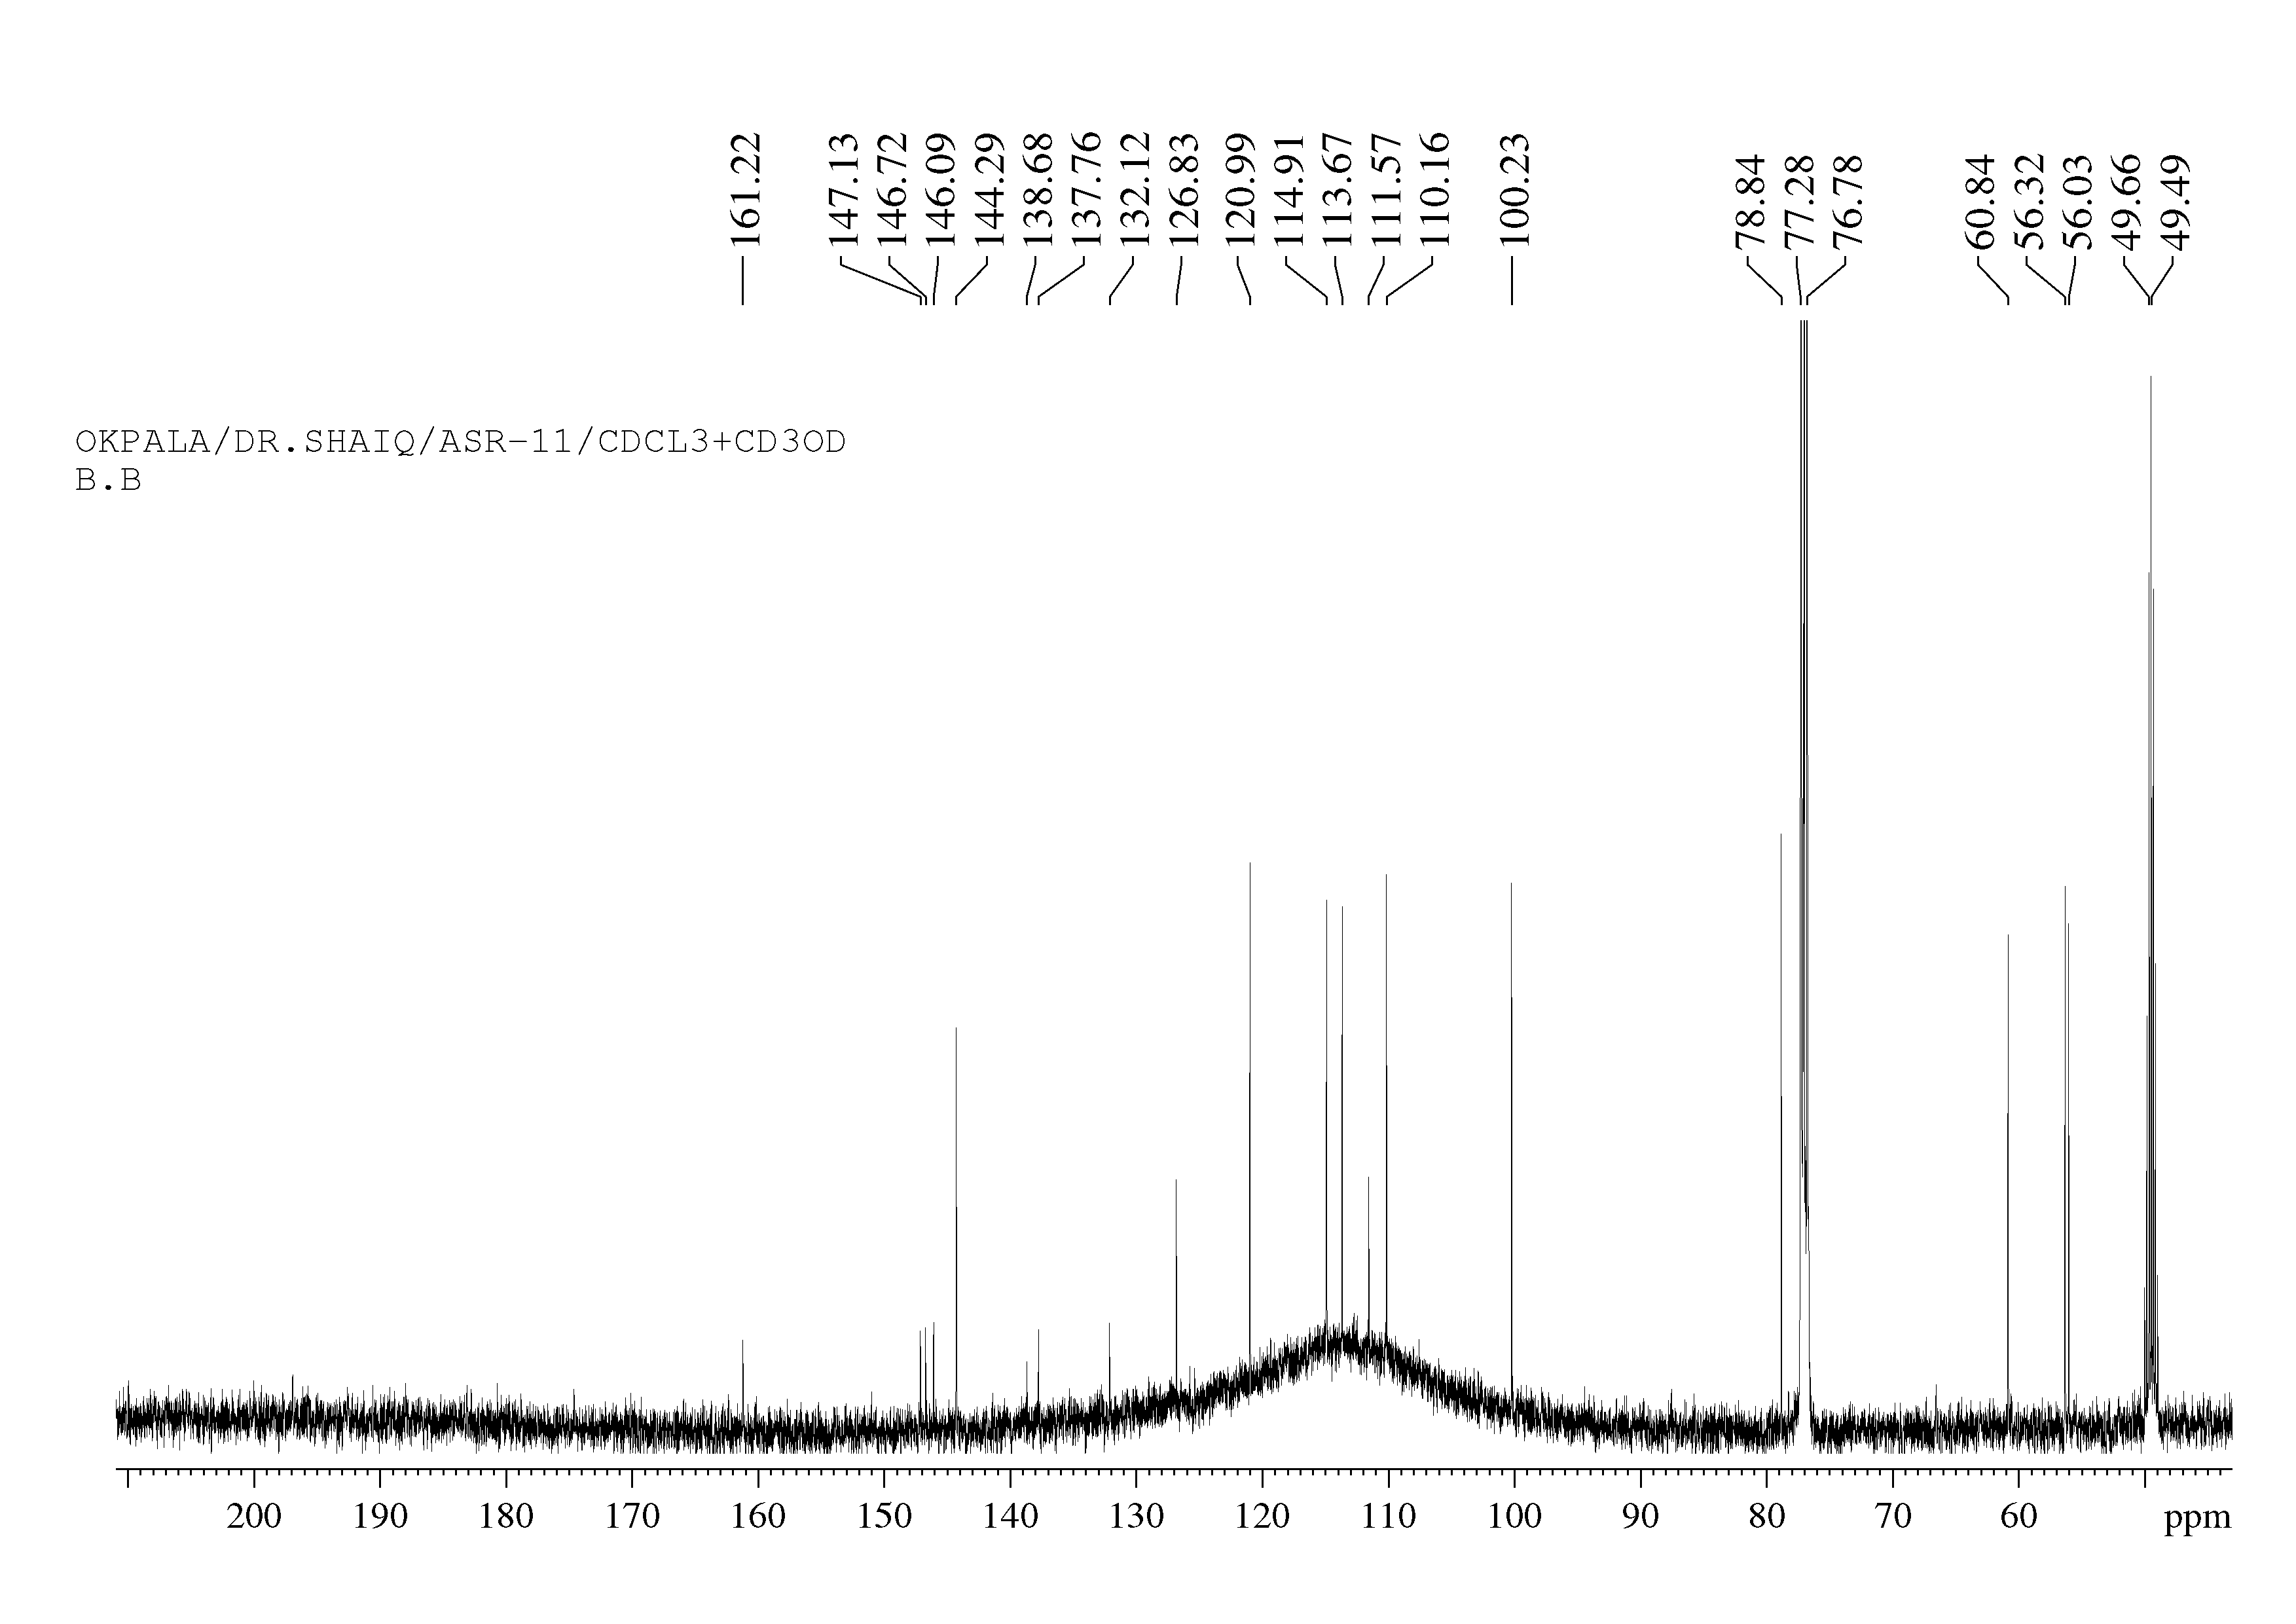
**

Fig. S3: DEPT 135 (CDCl3+ CD3OD, 150MHz) spectrum of compound 1(Cleomiscosin A)

**
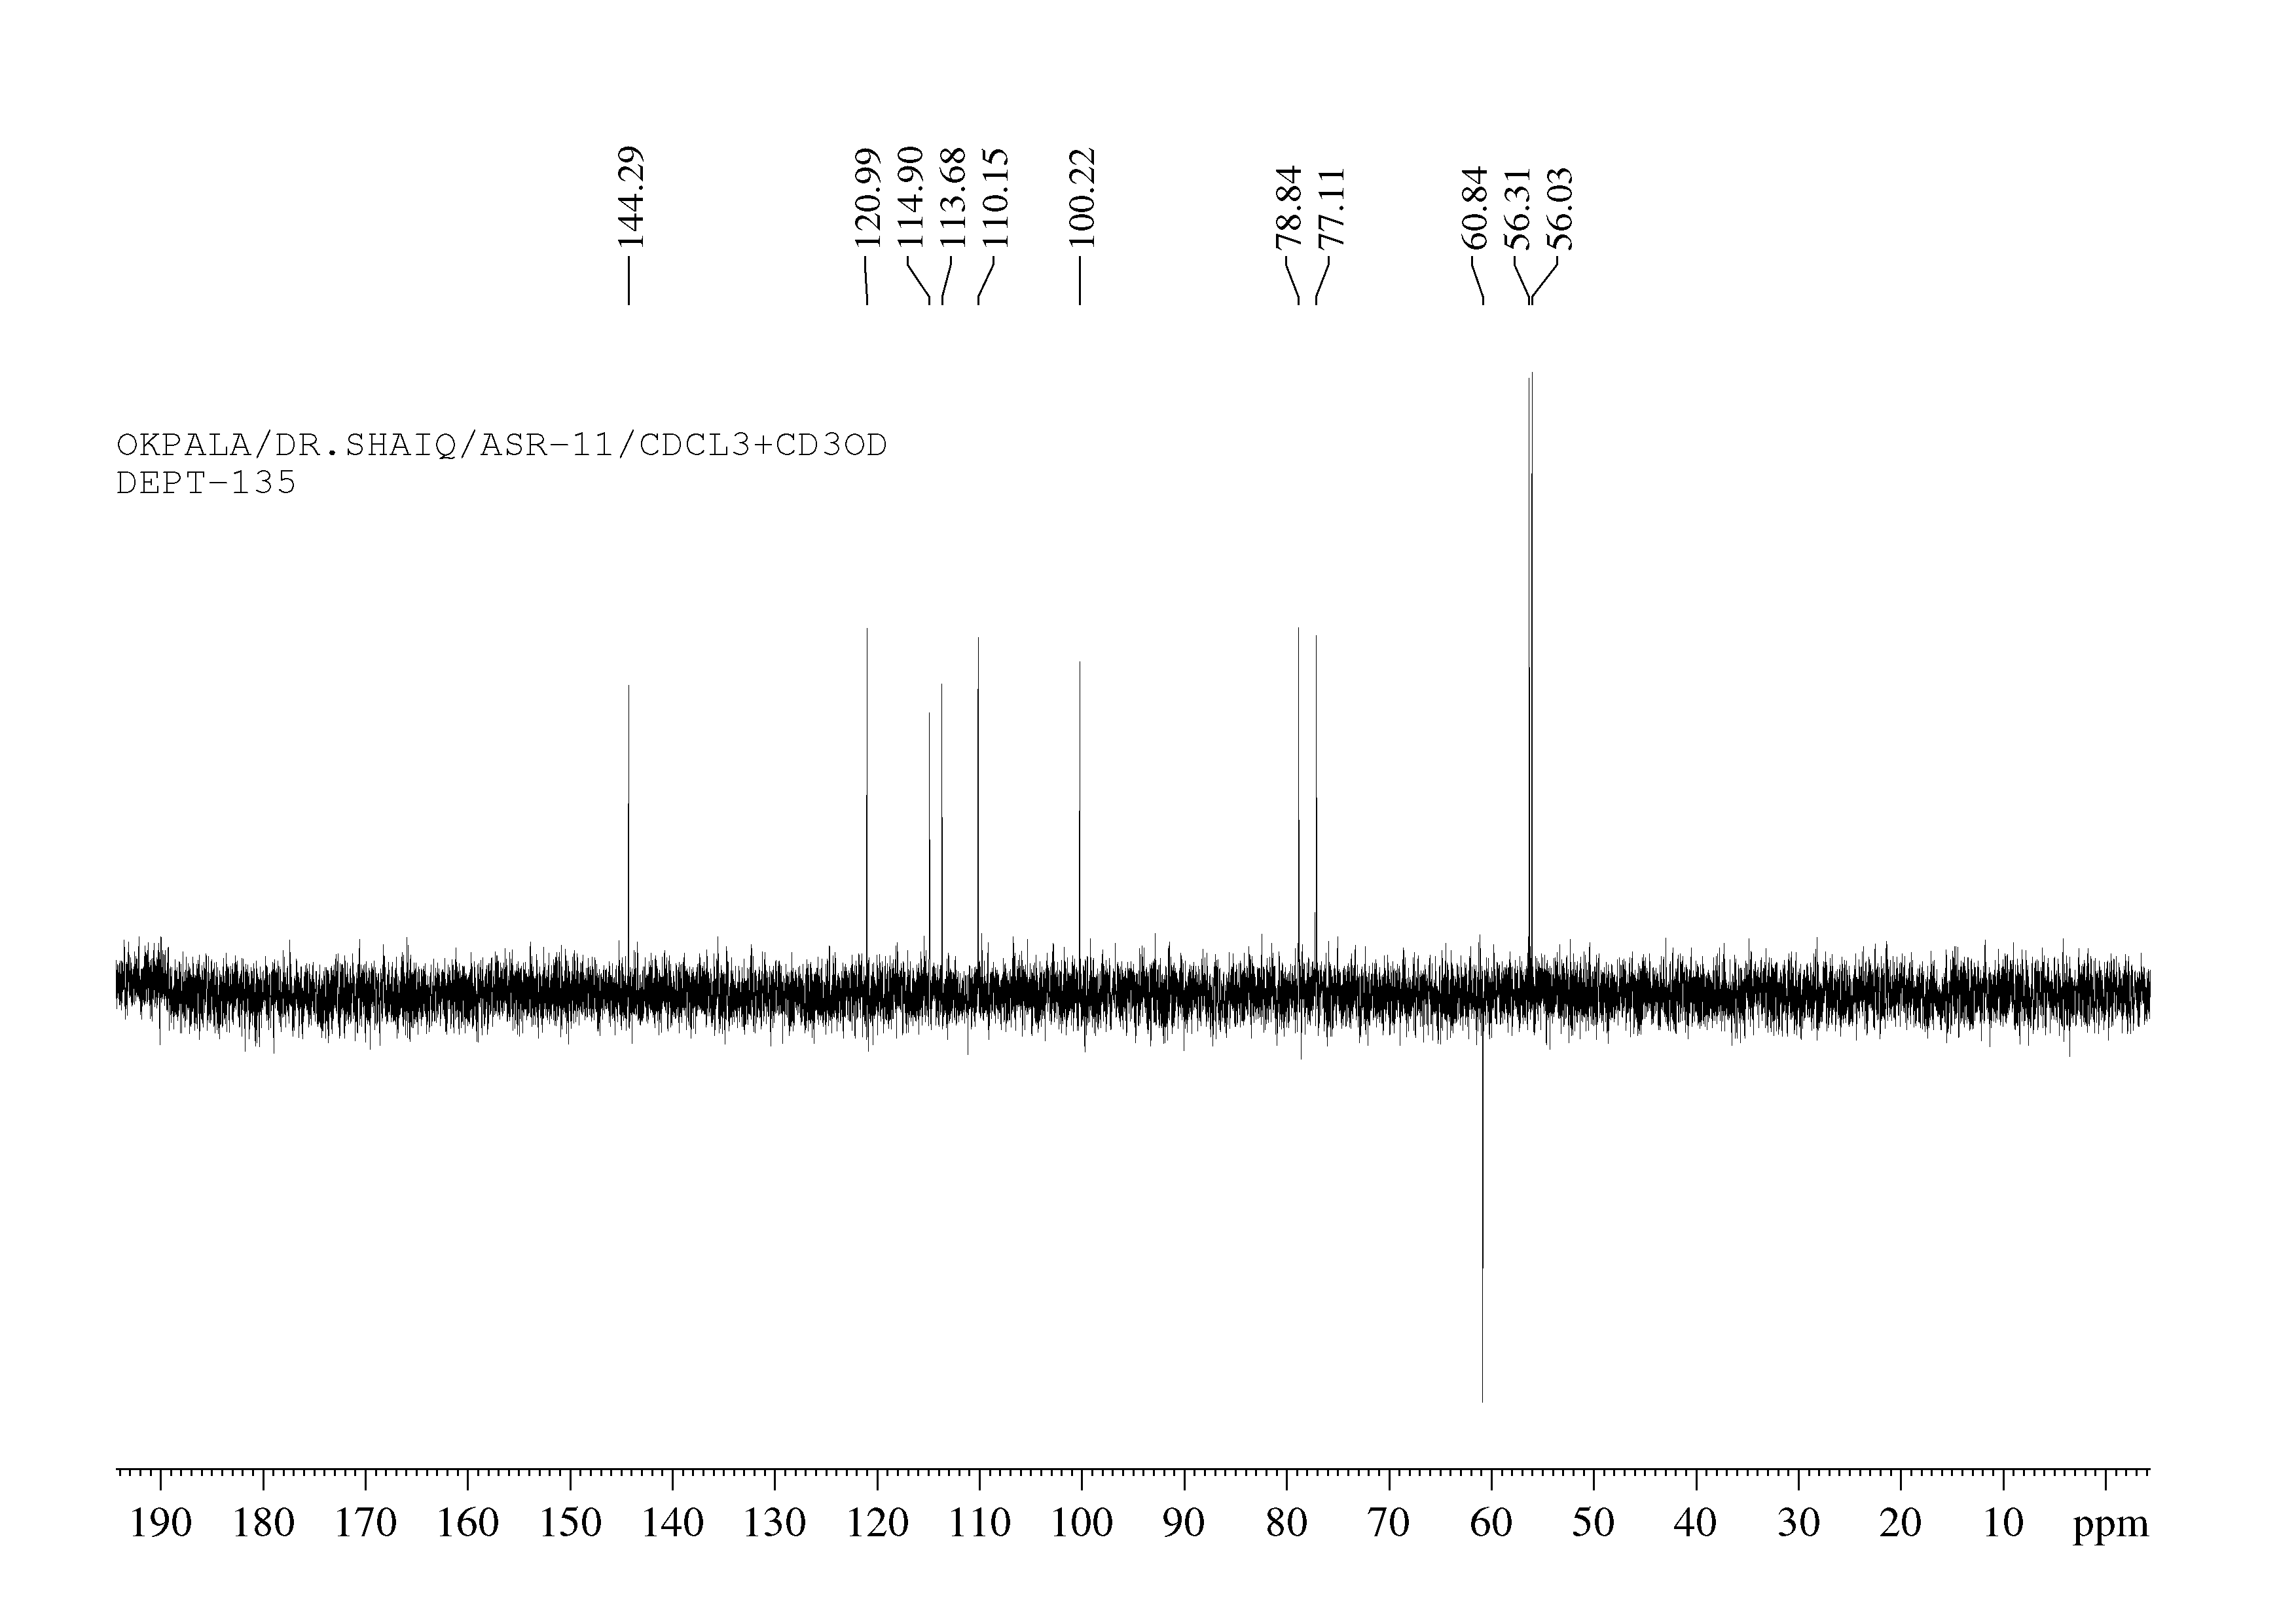
**

Fig. S4: DEPT 90 (CDCl3+ CD3OD, 150MHz) spectrum of compound 1 (Cleomiscosin A)

**
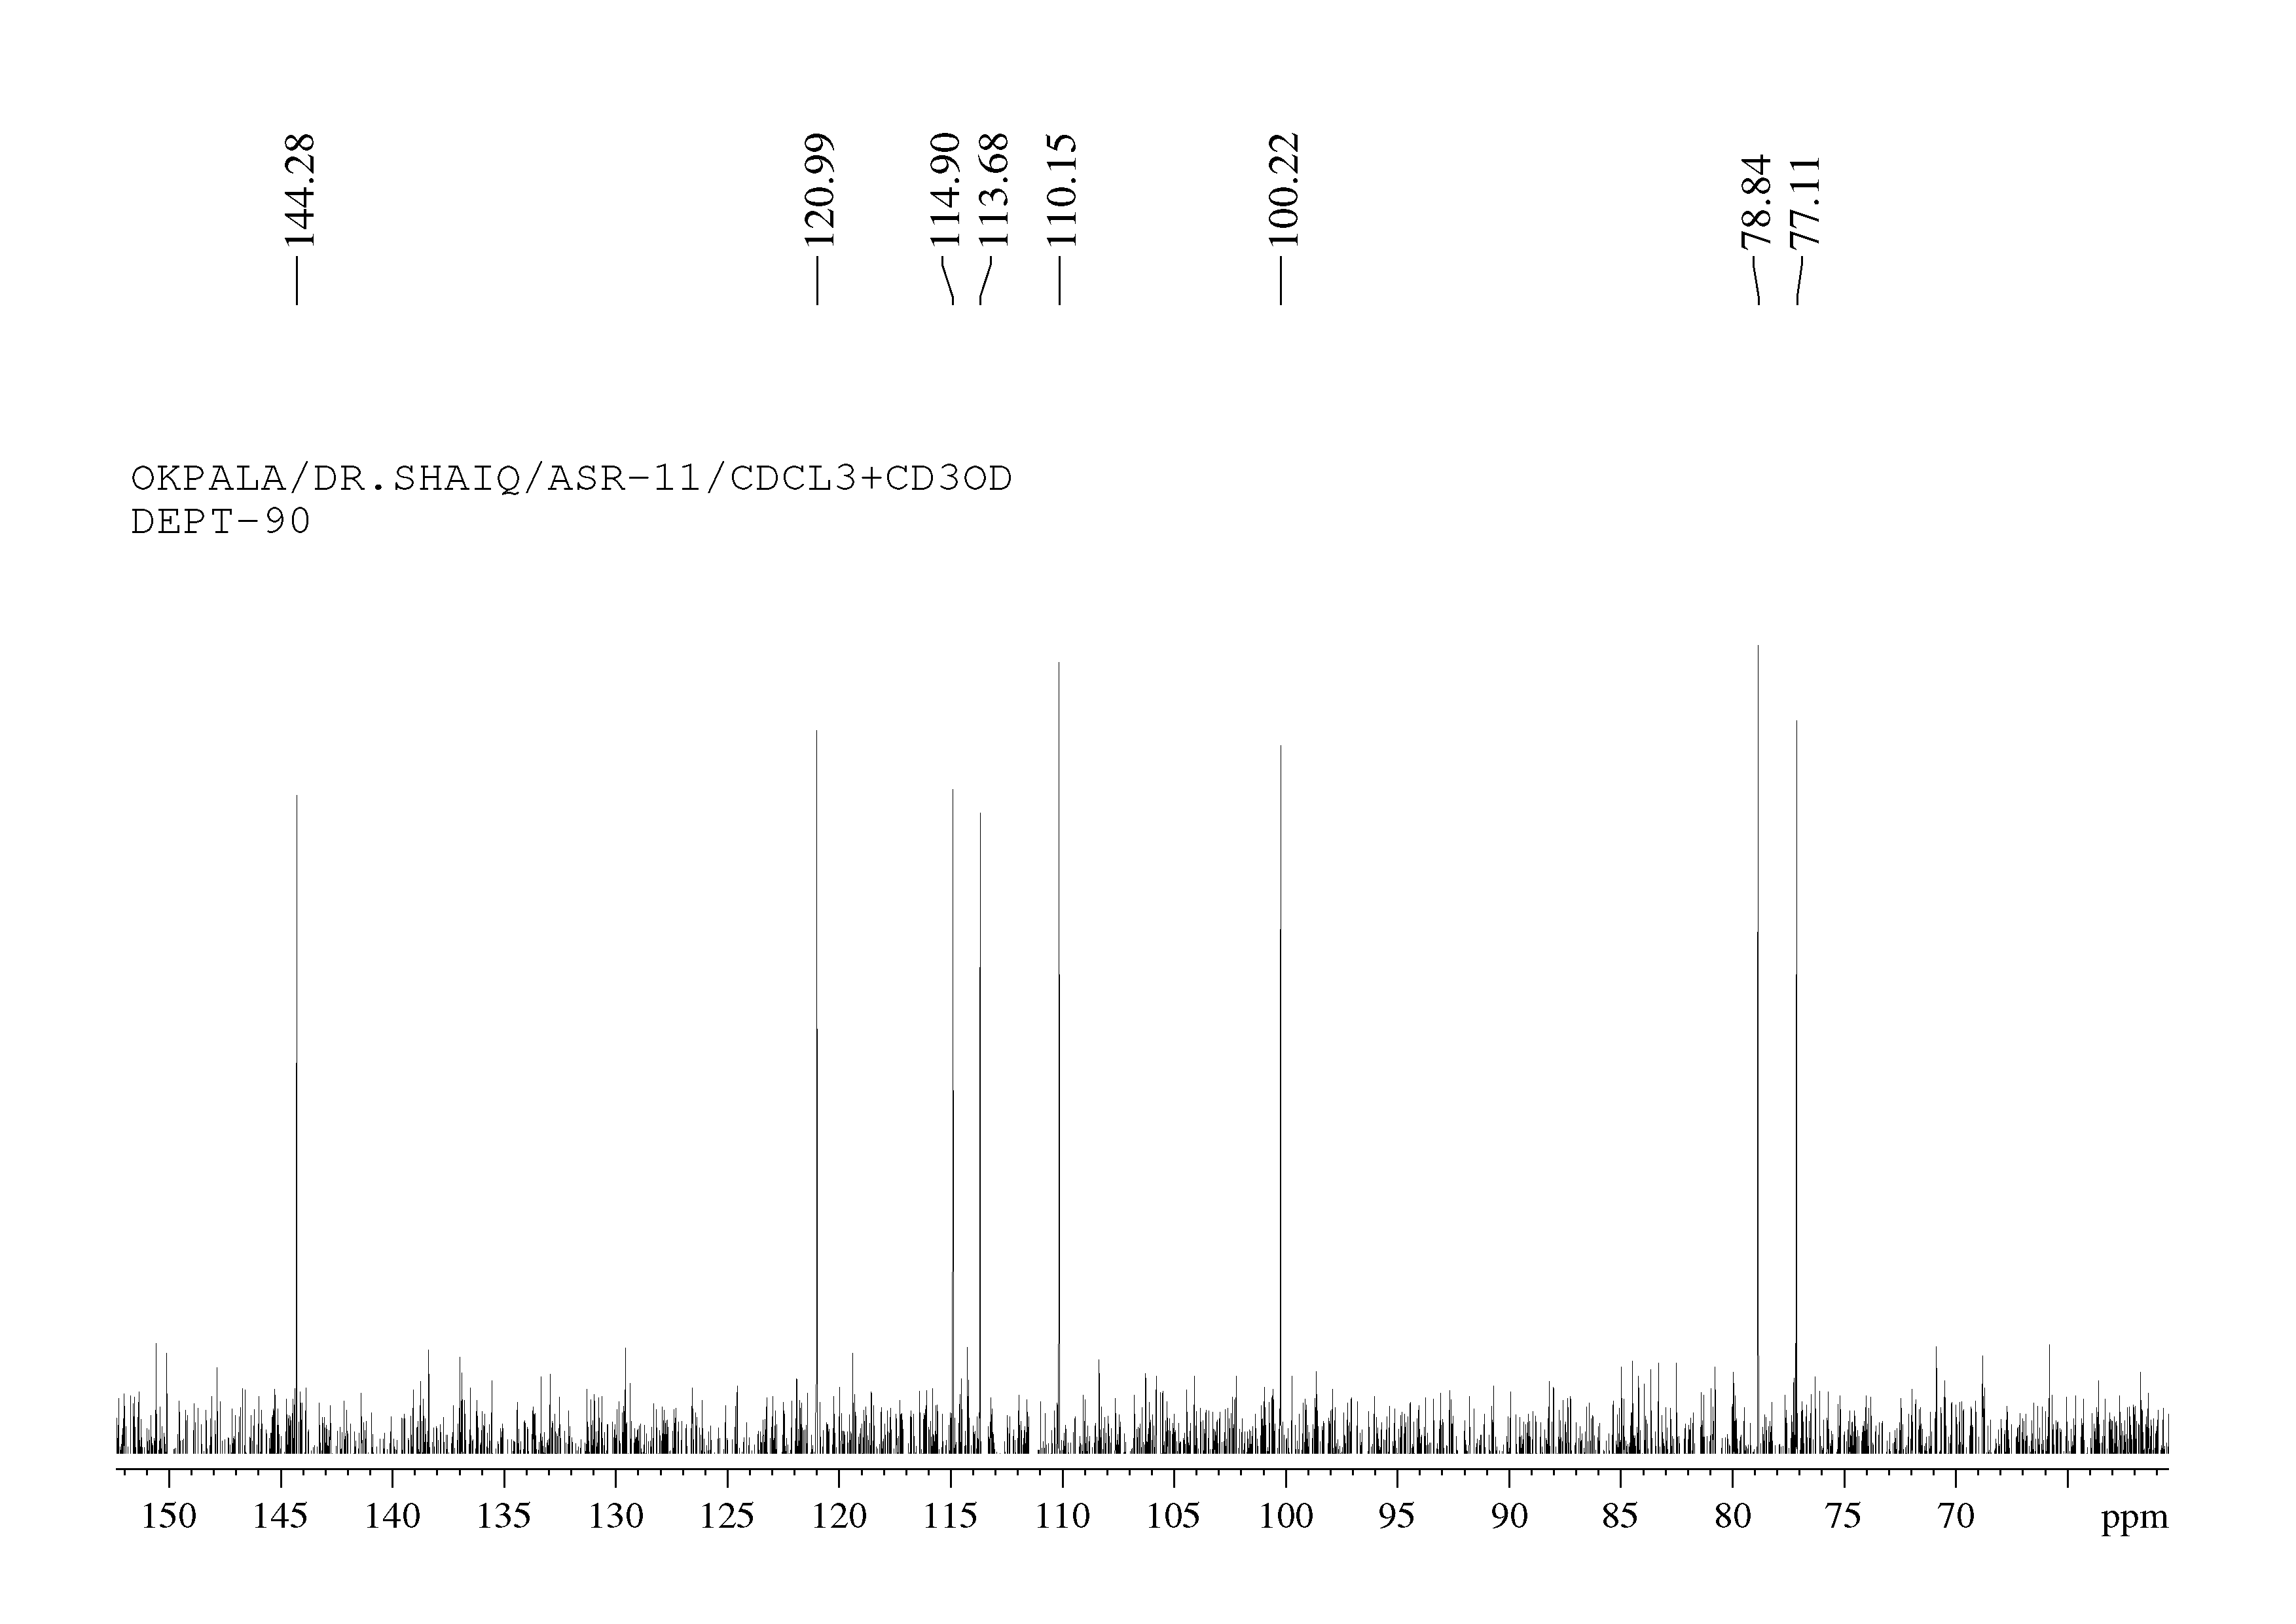
**

Fig. S5: COSY (CDCl3+ CD3OD, 150MHz) spectrum of compound 1 (Cleomiscosin A)

Fig. S6: HSQC (CDCl3+ CD3OD, 150MHz) spectrum of compound 1 (Cleomiscosin A)

**\**

Fig. S7: HMBC (CDCl3+ CD3OD, 150MHz) spectrum of compound 1 (Cleomiscosin A)

Fig. S8: Mass spectrum of compound 1 (Cleomiscosin A)


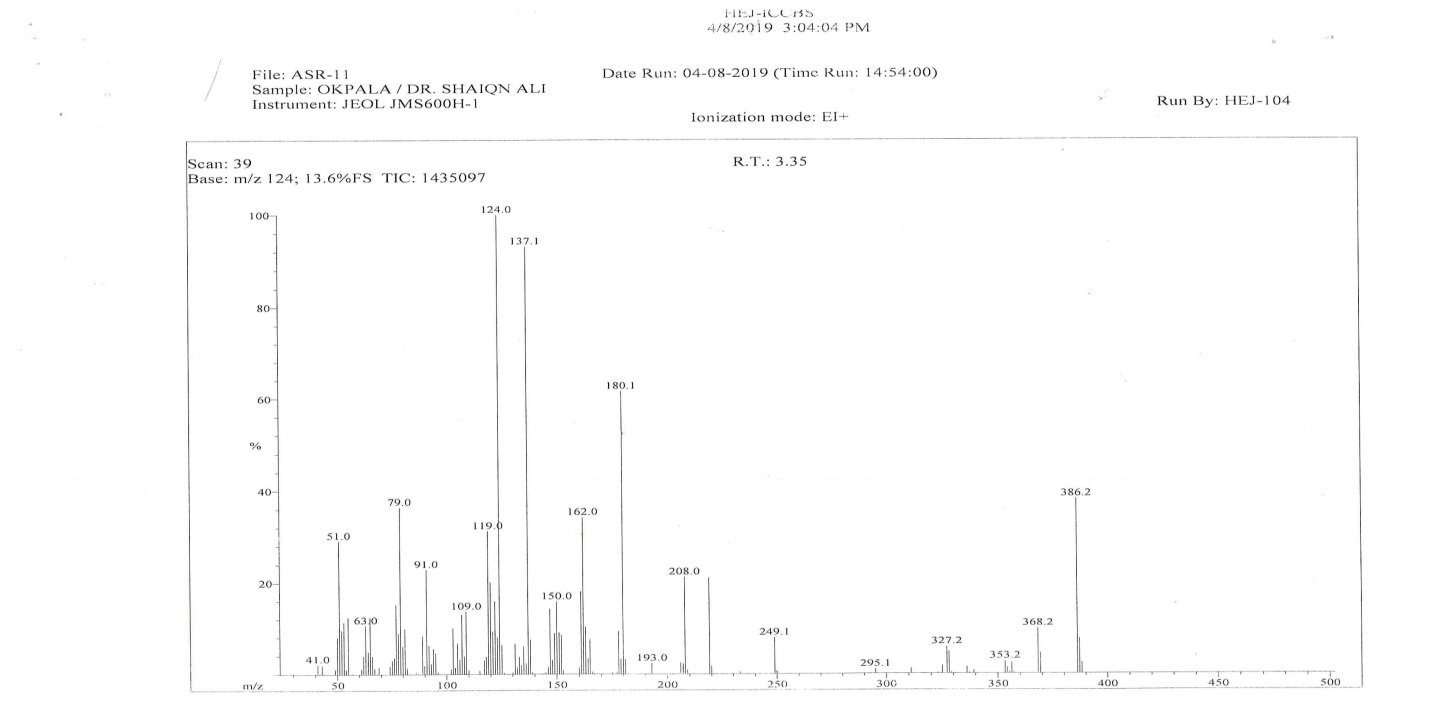


Fig. S9: IR spectrum of compound 1 (Cleomiscosin A)


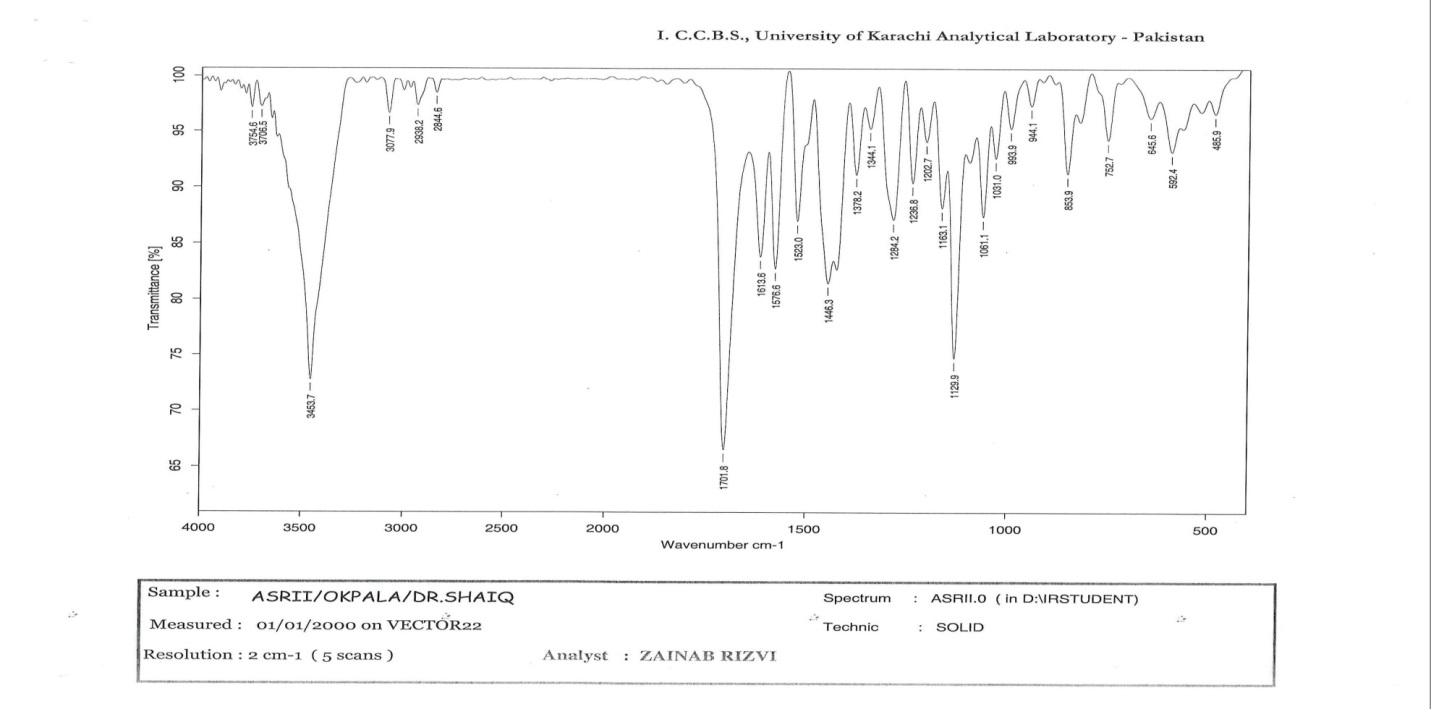


Fig. S10: UV spectrum of compound 1 (Cleomiscosin A)


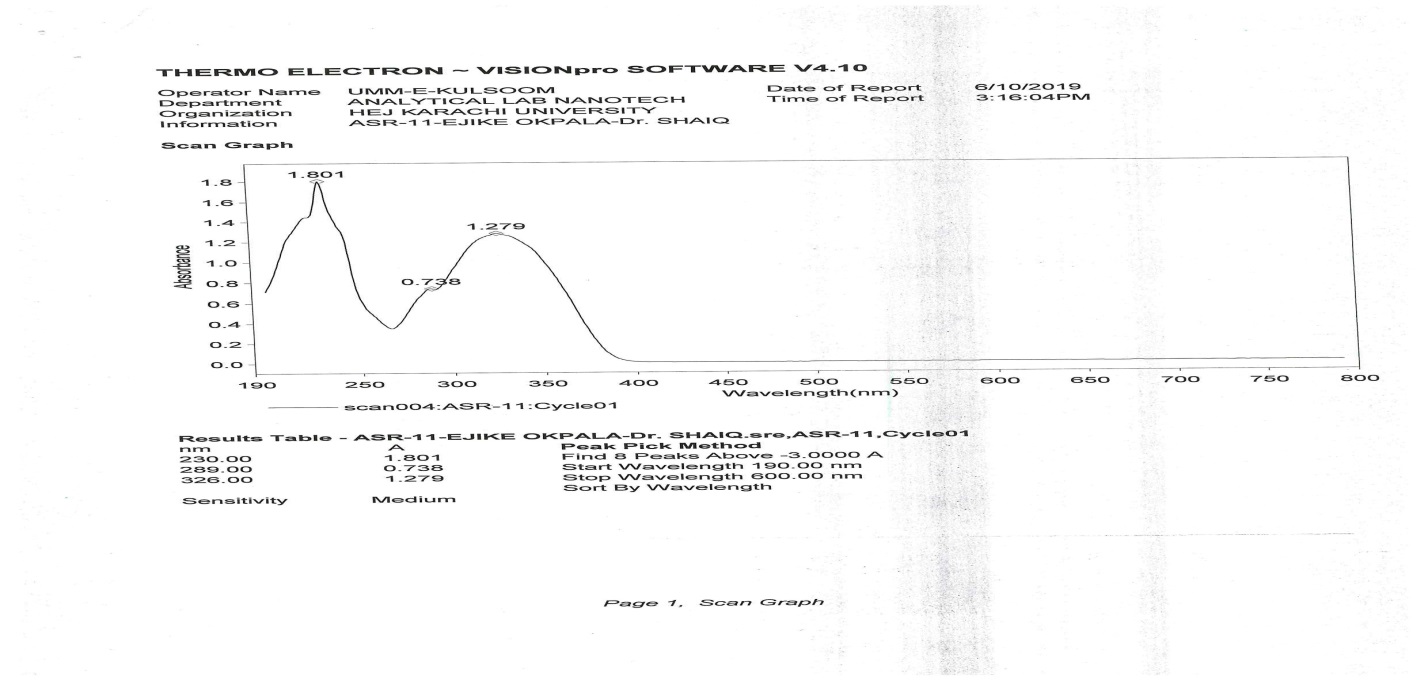


Fig. S11: 1H-NMR (CDCl3+ CD3OD, 500MHz) spectrum of compound 2 (Cleomiscosin C)

**
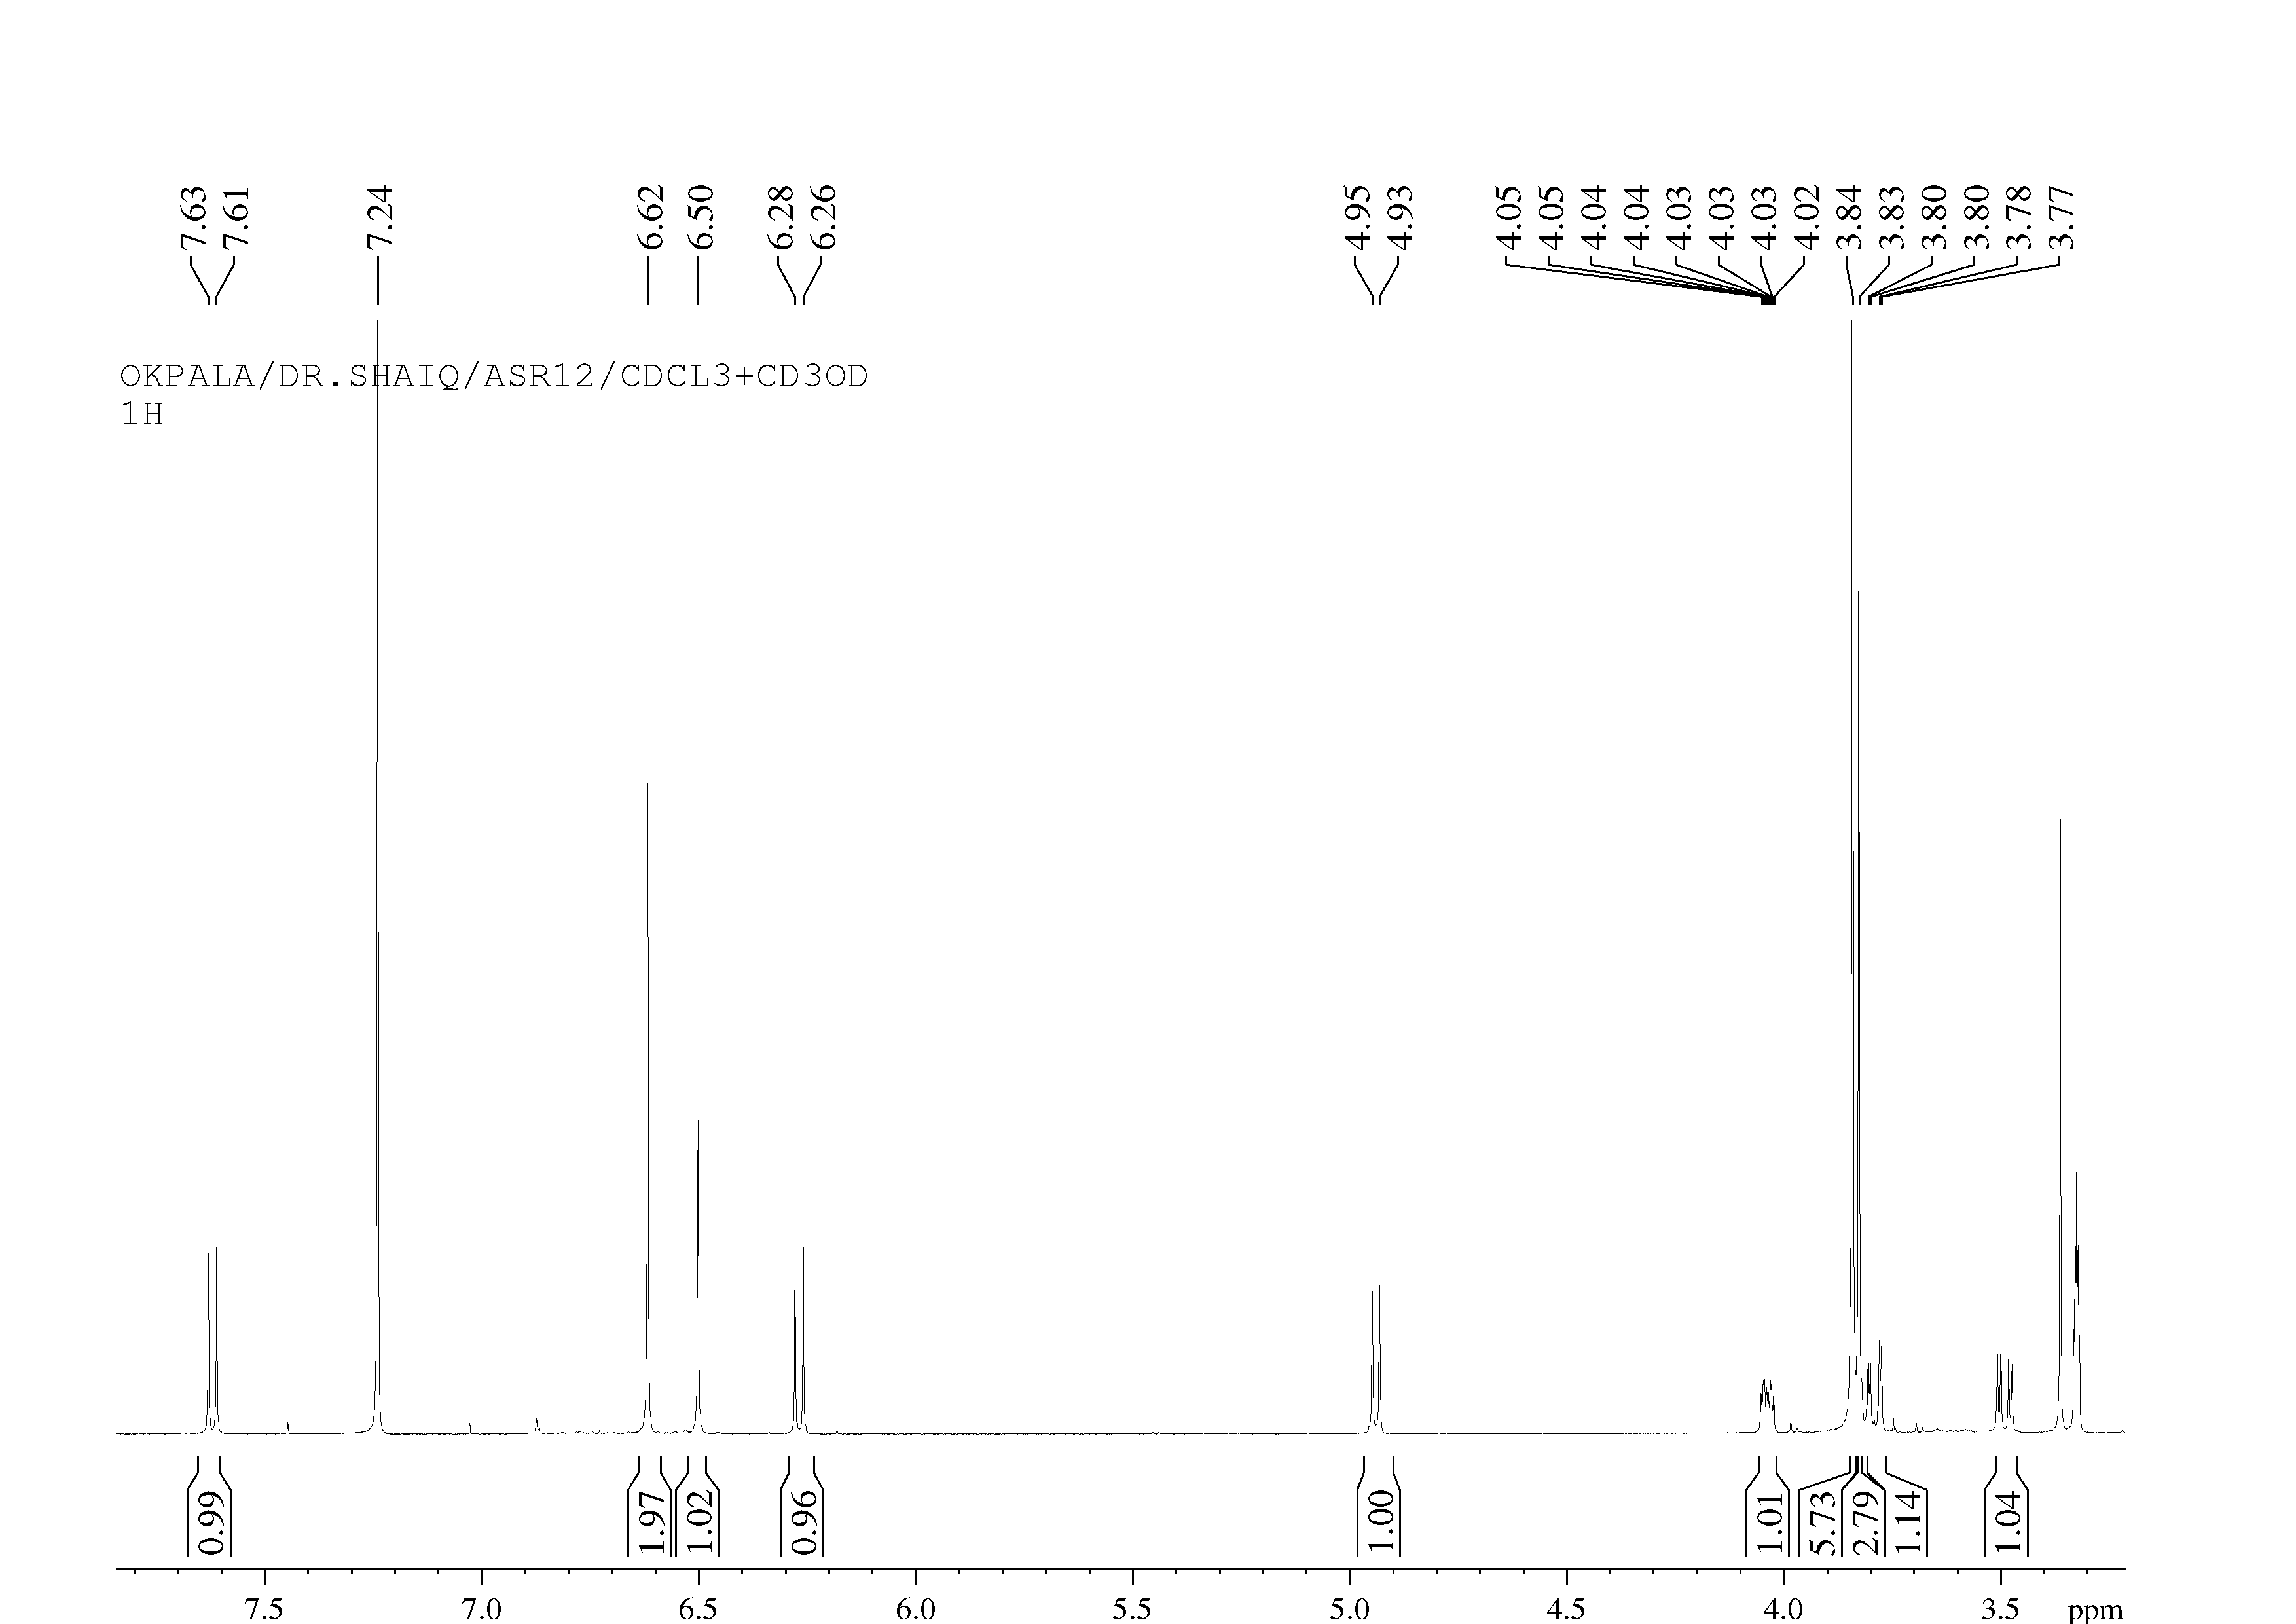
**

Fig. S12: 13C-NMR (CDCl3+ CD3OD, 150MHz) spectrum of compound 2 (Cleomiscosin C)

**
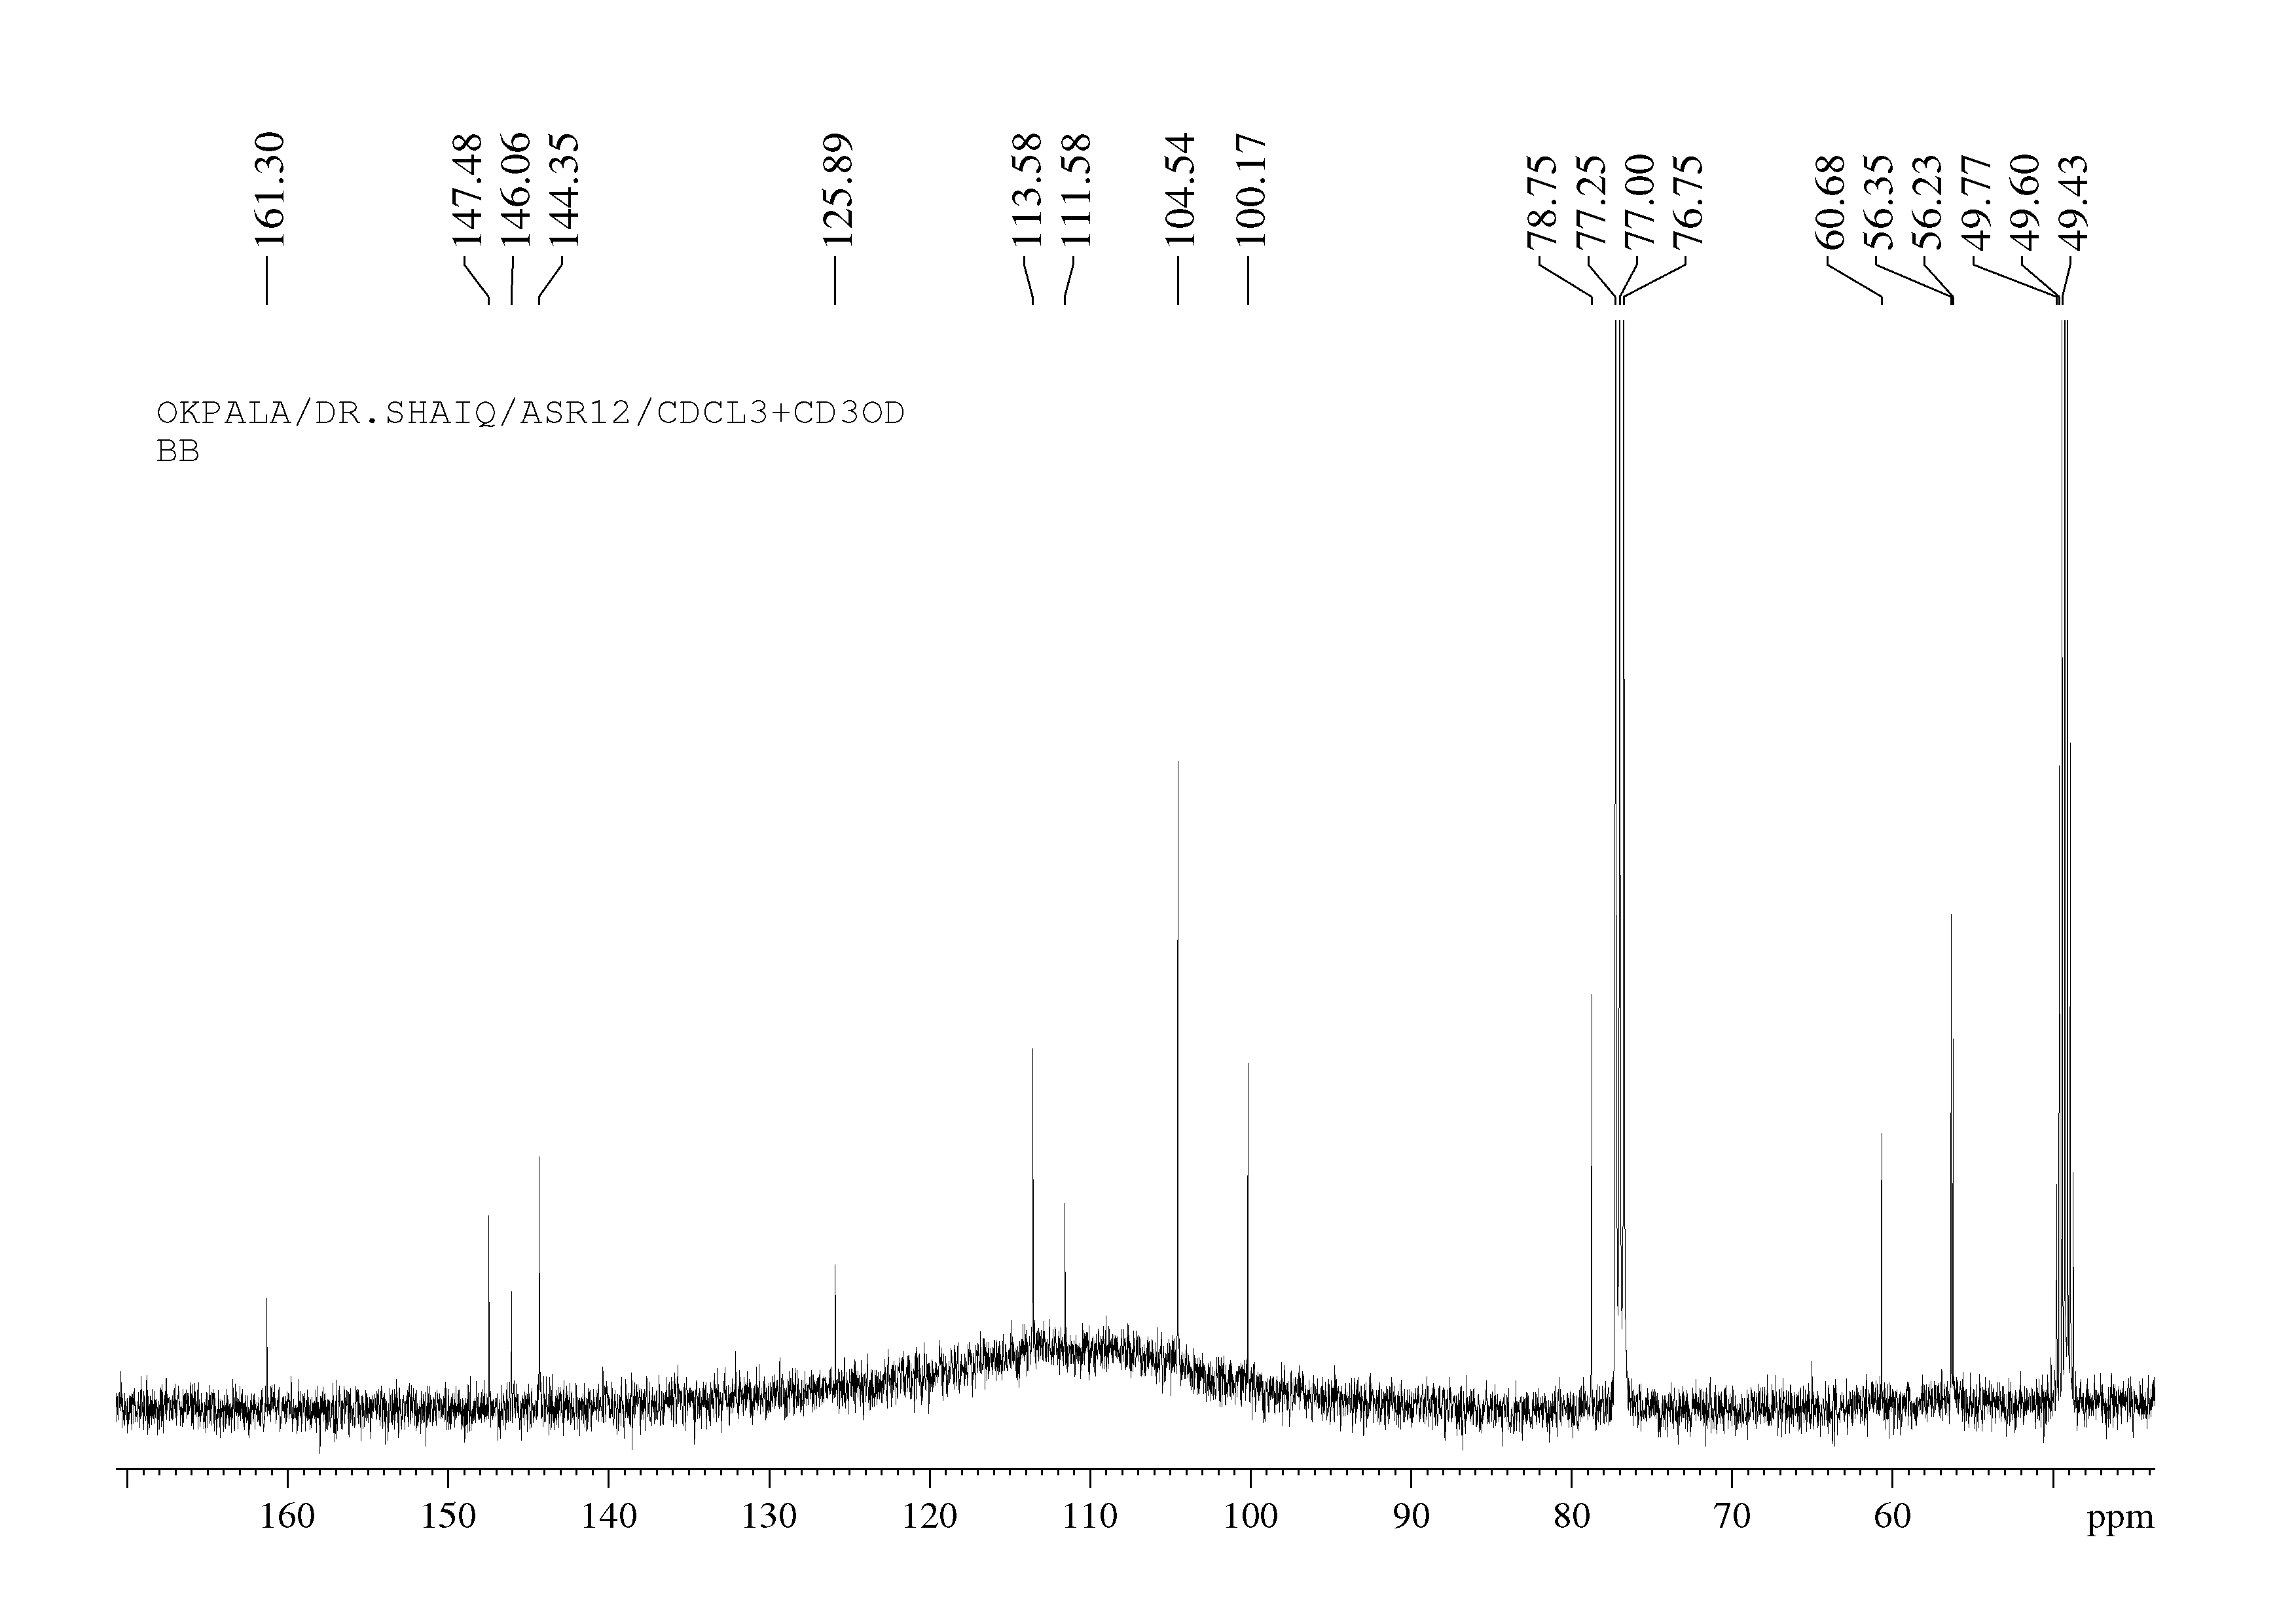
**

Fig. S13: DEPT 135 (CDCl3+ CD3OD, 150MHz) spectrum of compound 2 (Cleomiscosin C)

**
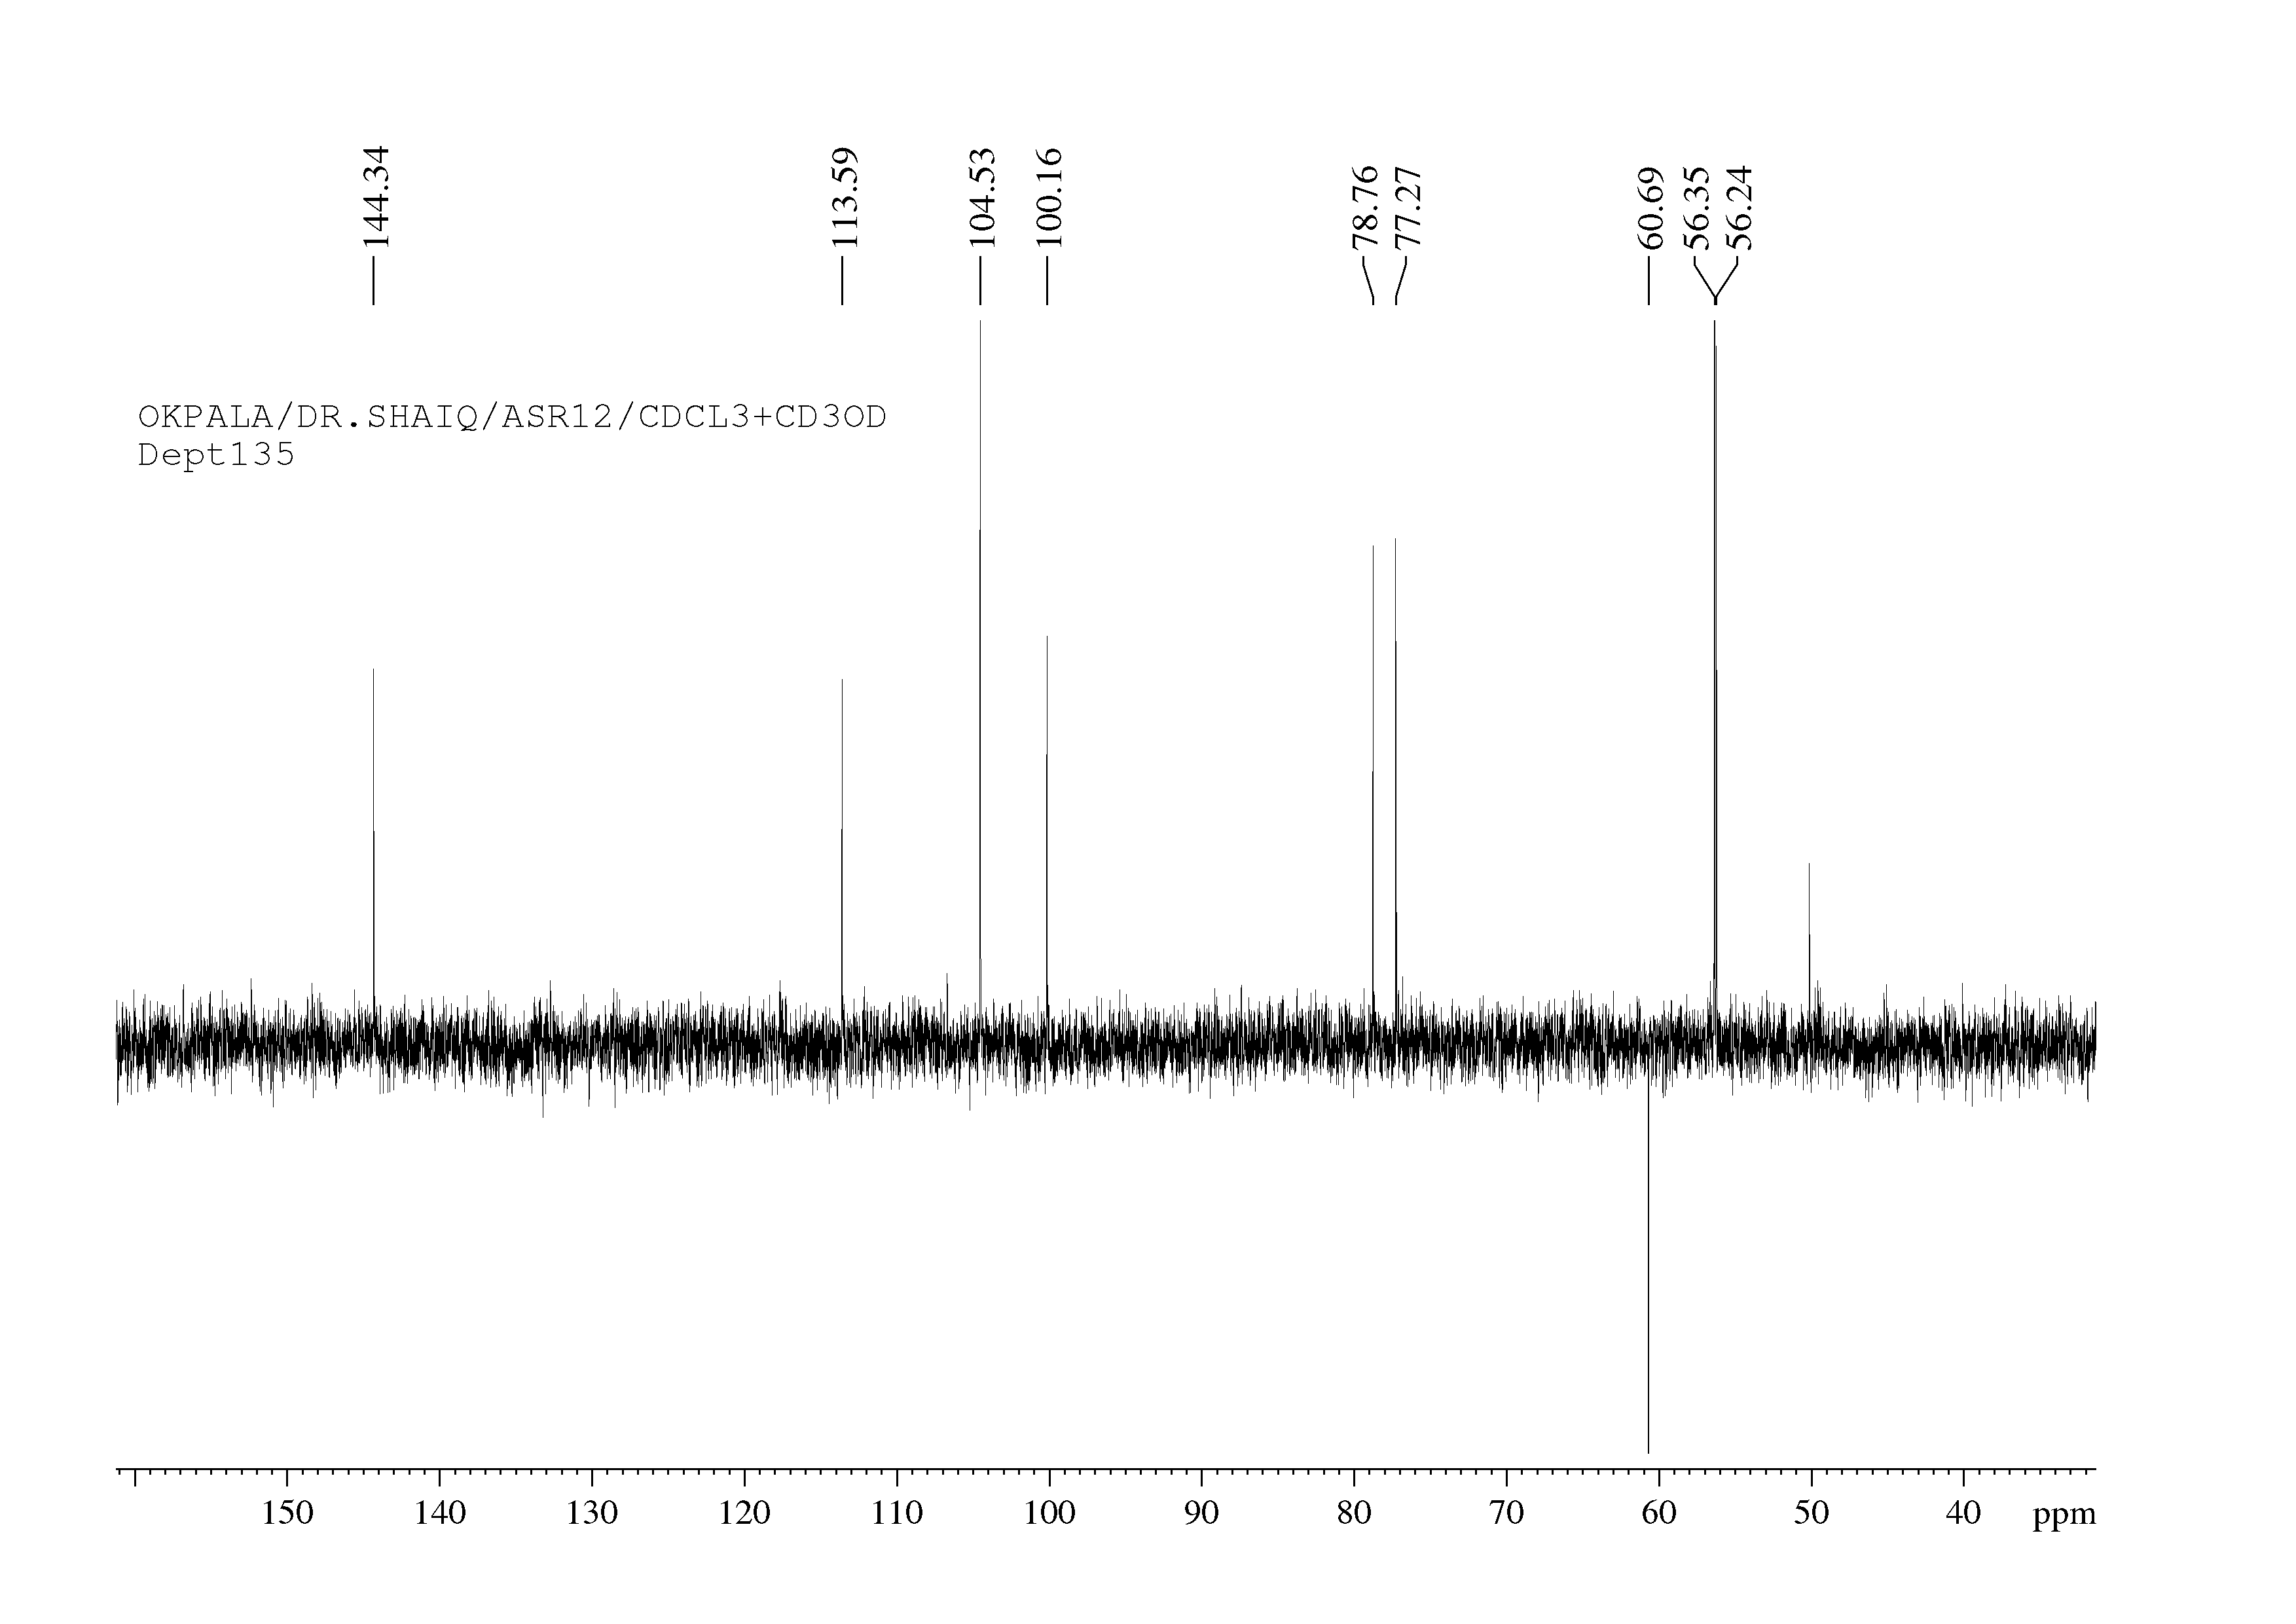
**

Fig. S14: DEPT 90 (CDCl3+ CD3OD, 150MHz) spectrum of compound 2 (Cleomiscosin C)

**
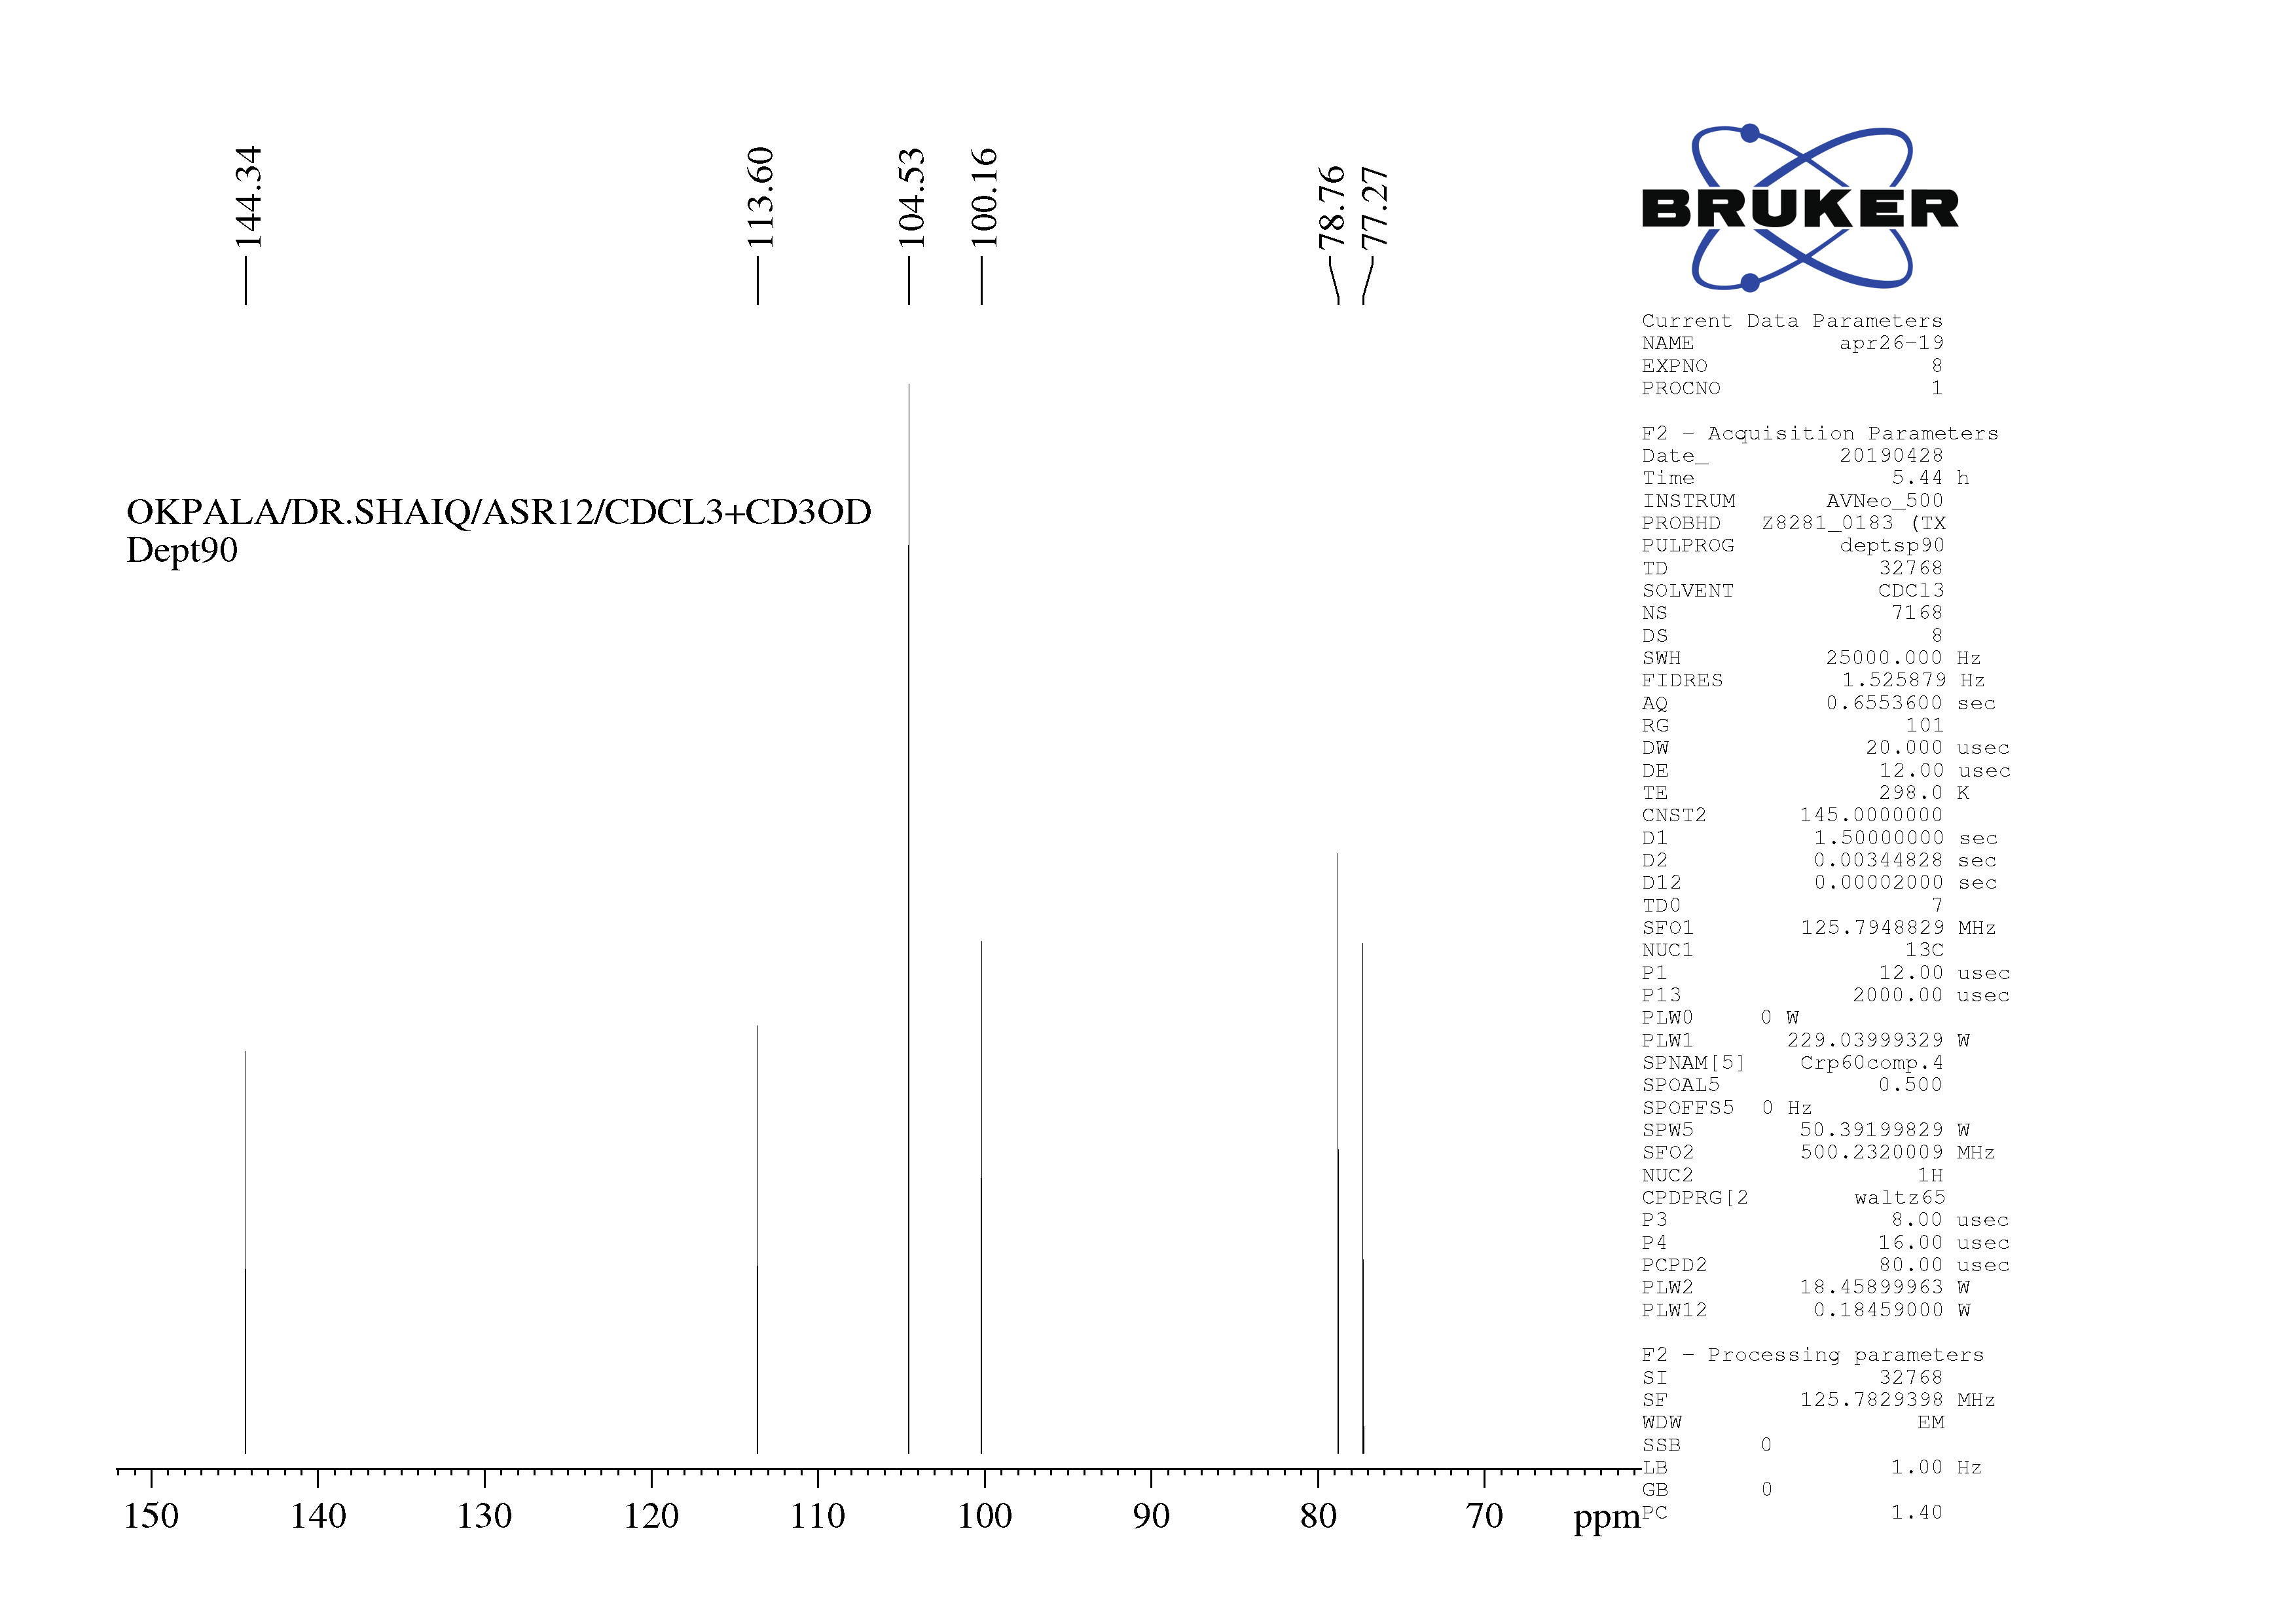
**

Fig. S15: HSQC (CDCl3+ CD3OD, 150MHz) spectrum of compound 2 (Cleomiscosin C)

Fig. S16: HMBC (CDCl3+ CD3OD, 150MHz) spectrum of compound 2 (Cleomiscosin C)

Fig. S17: COSY (CDCl3+ CD3OD, 150MHz) spectrum of compound 2 (Cleomiscosin C)

Fig. S18: Mass spectrum of compound 2 (Cleomiscosin C)


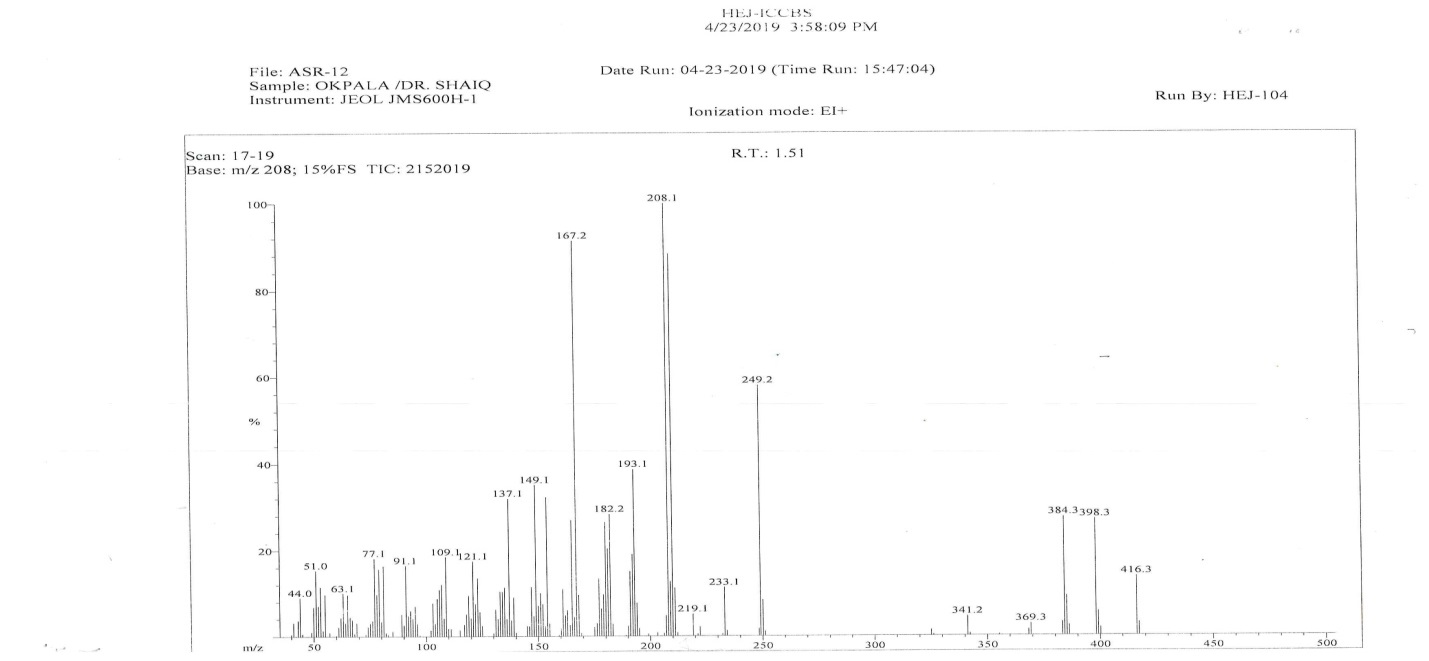


Fig. S19: IR spectrum of compound 2 (Cleomiscosin C)


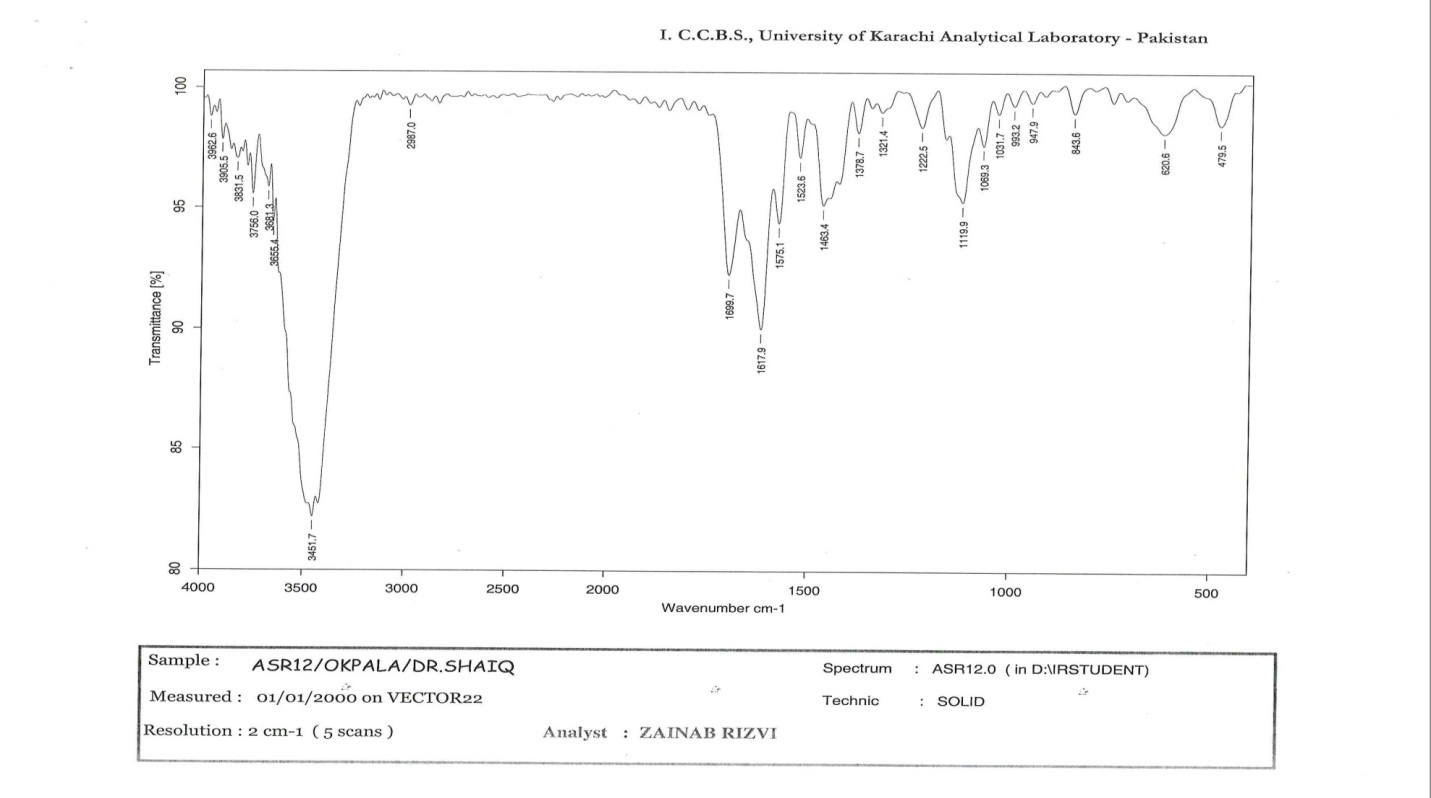


Fig. S20: UV spectrum of compound 2 (Cleomiscosin C)


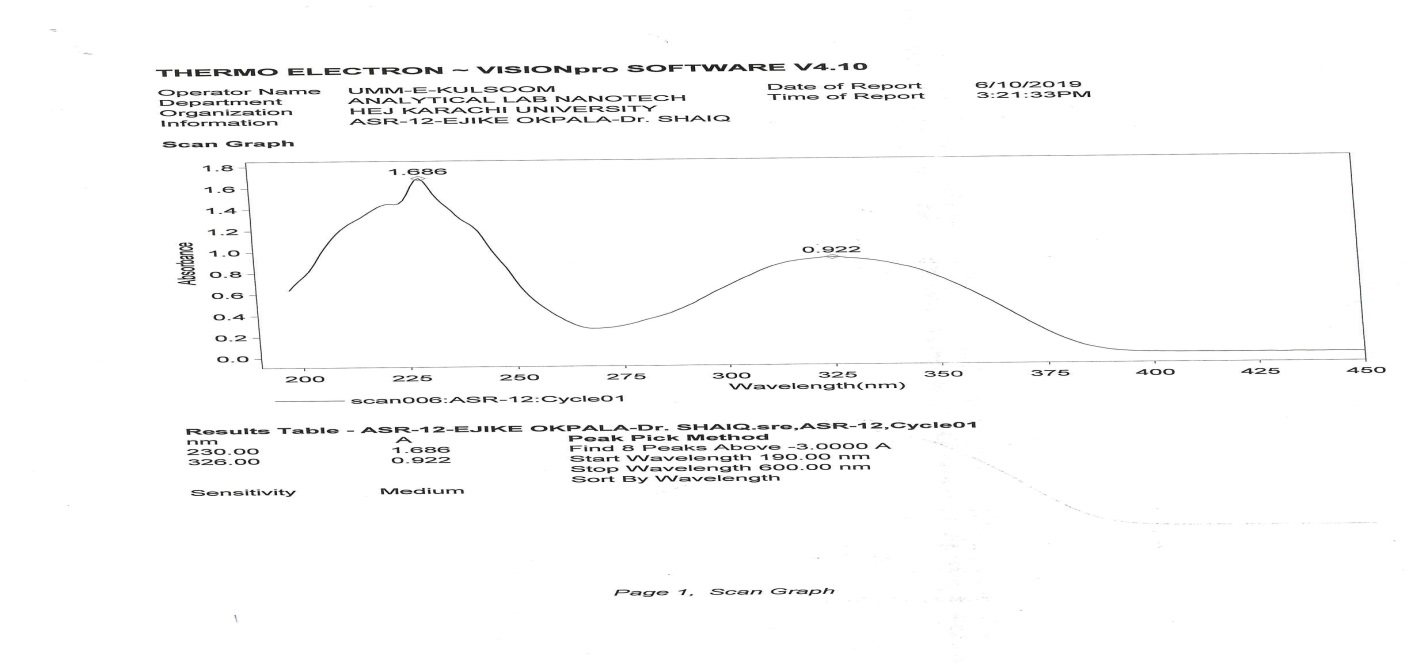


Fig. S21: 1H NMR (CD3OD, 400MHz) spectrum of compound 3 (Scopoletin)


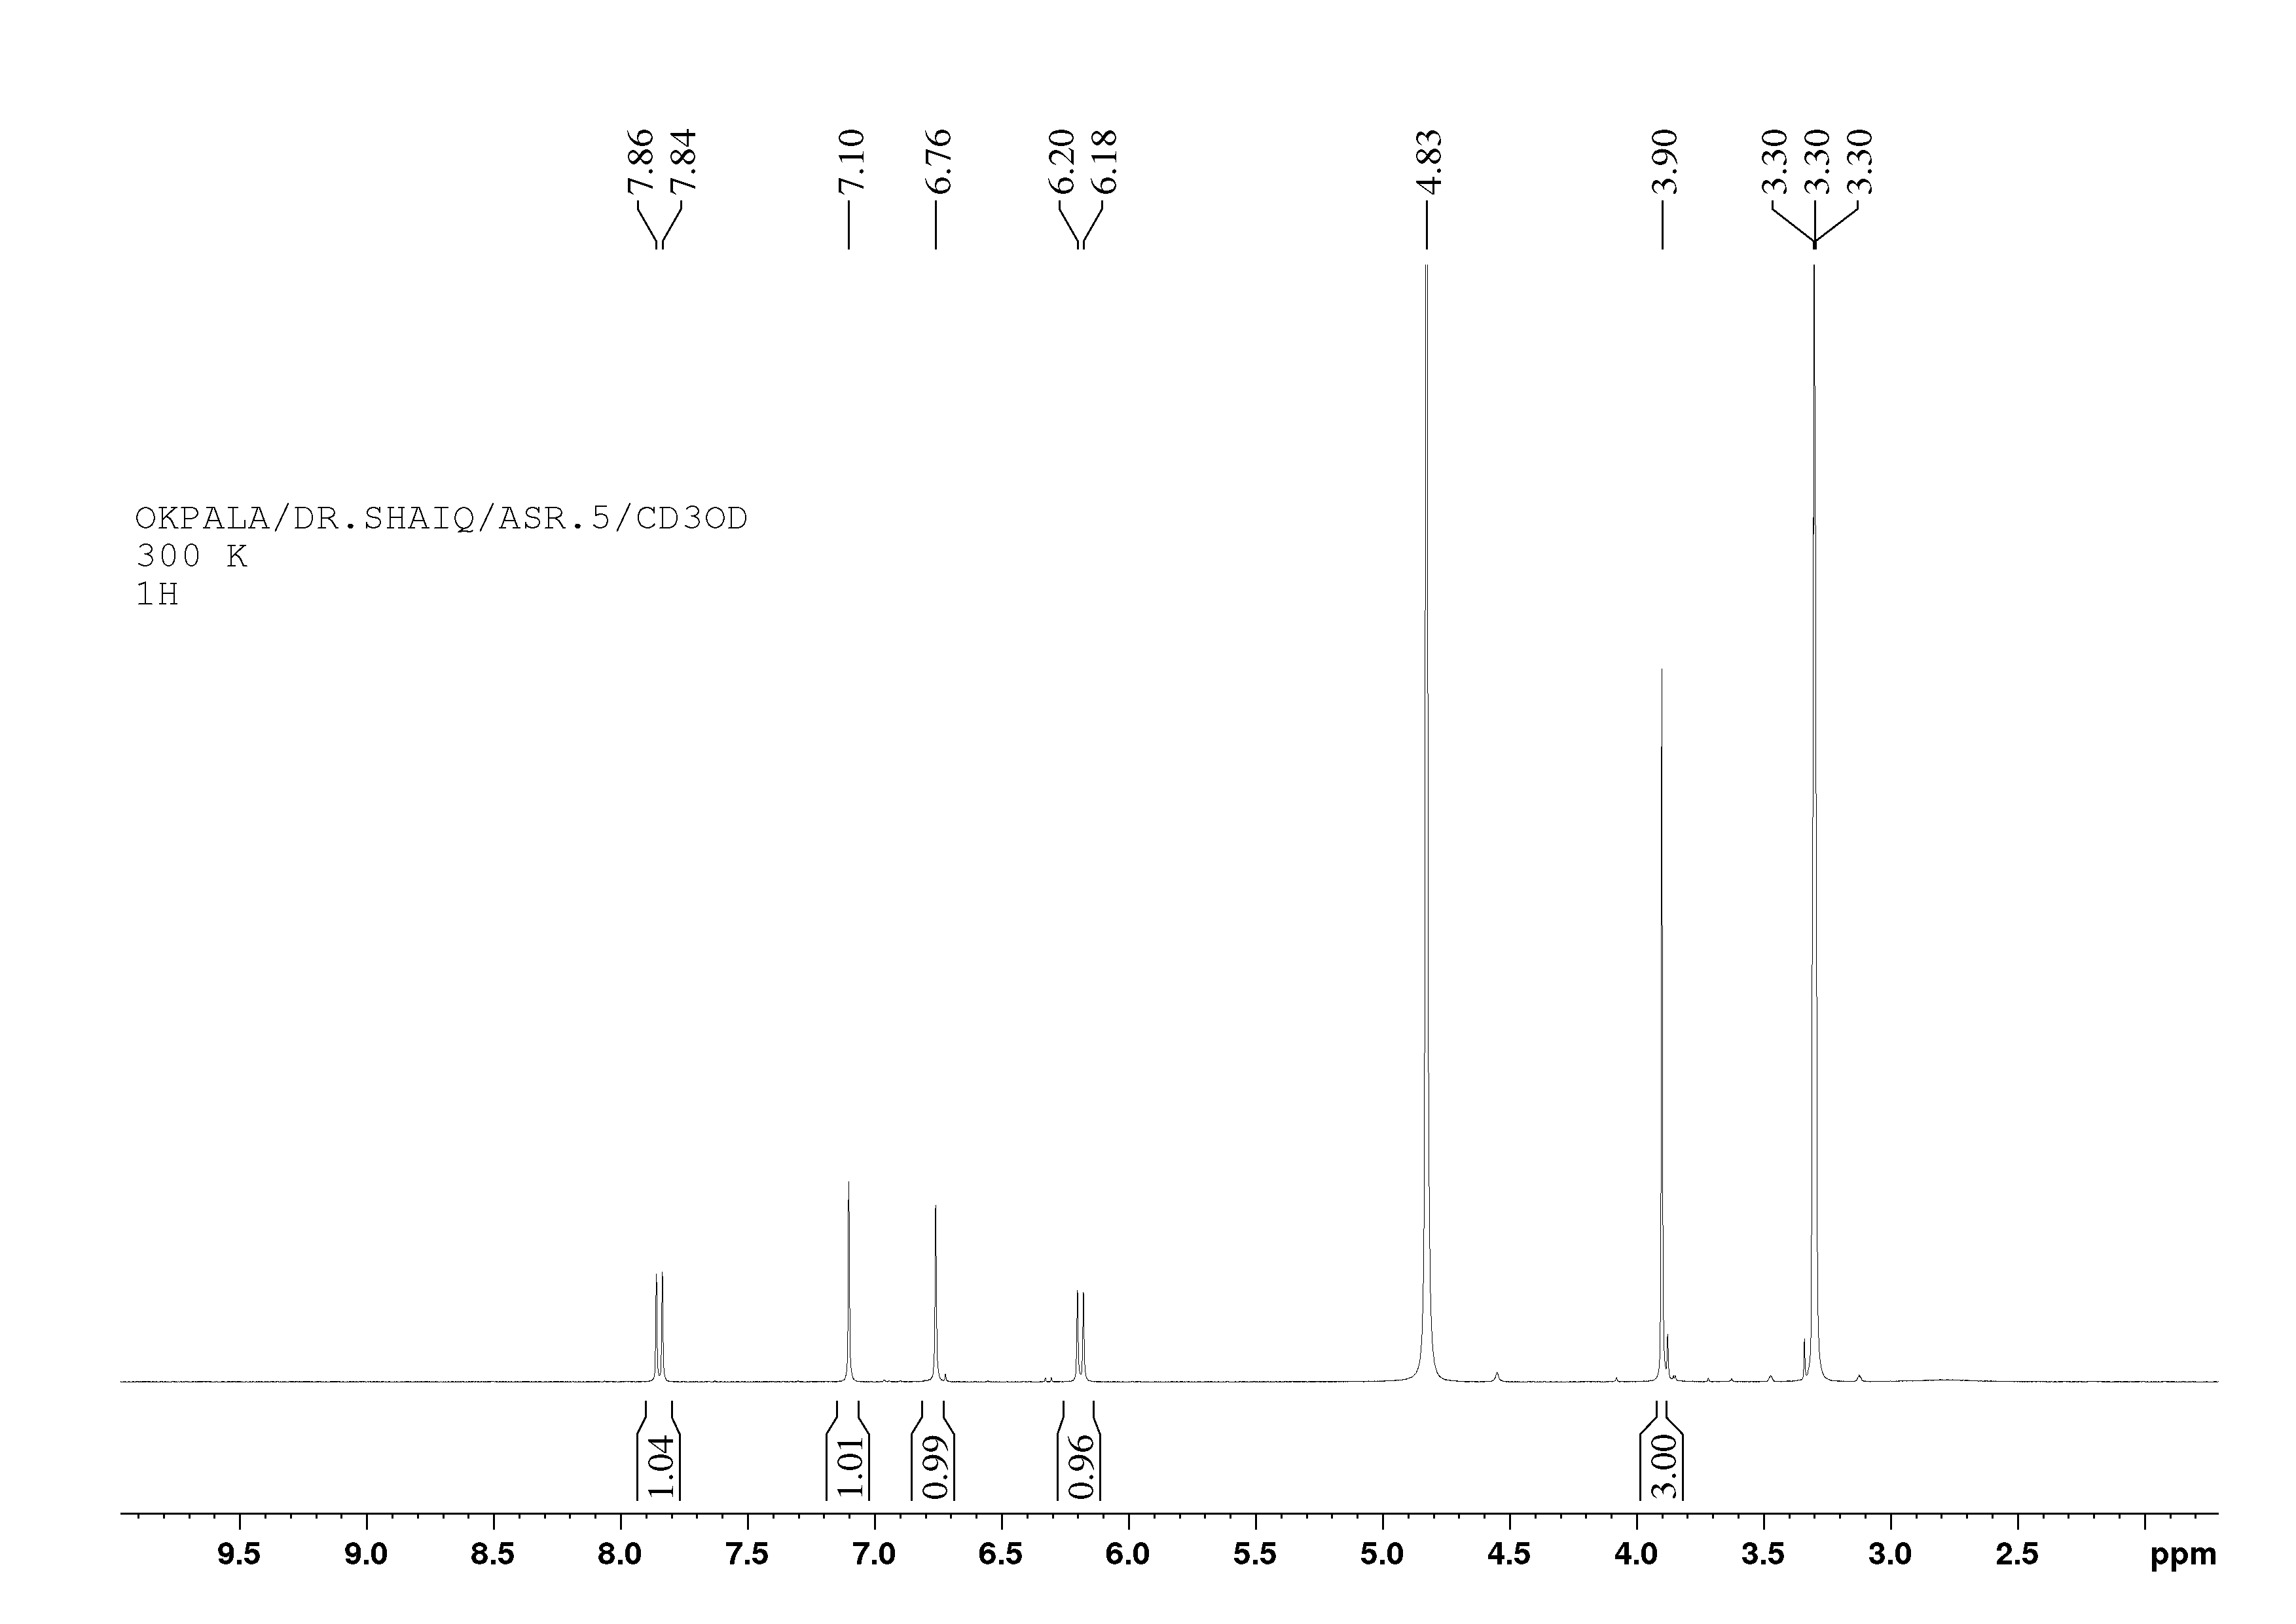


Fig. S22: 13C-NMR (CD3OD, 100MHz) spectrum of compound 3 (Scopoletin)


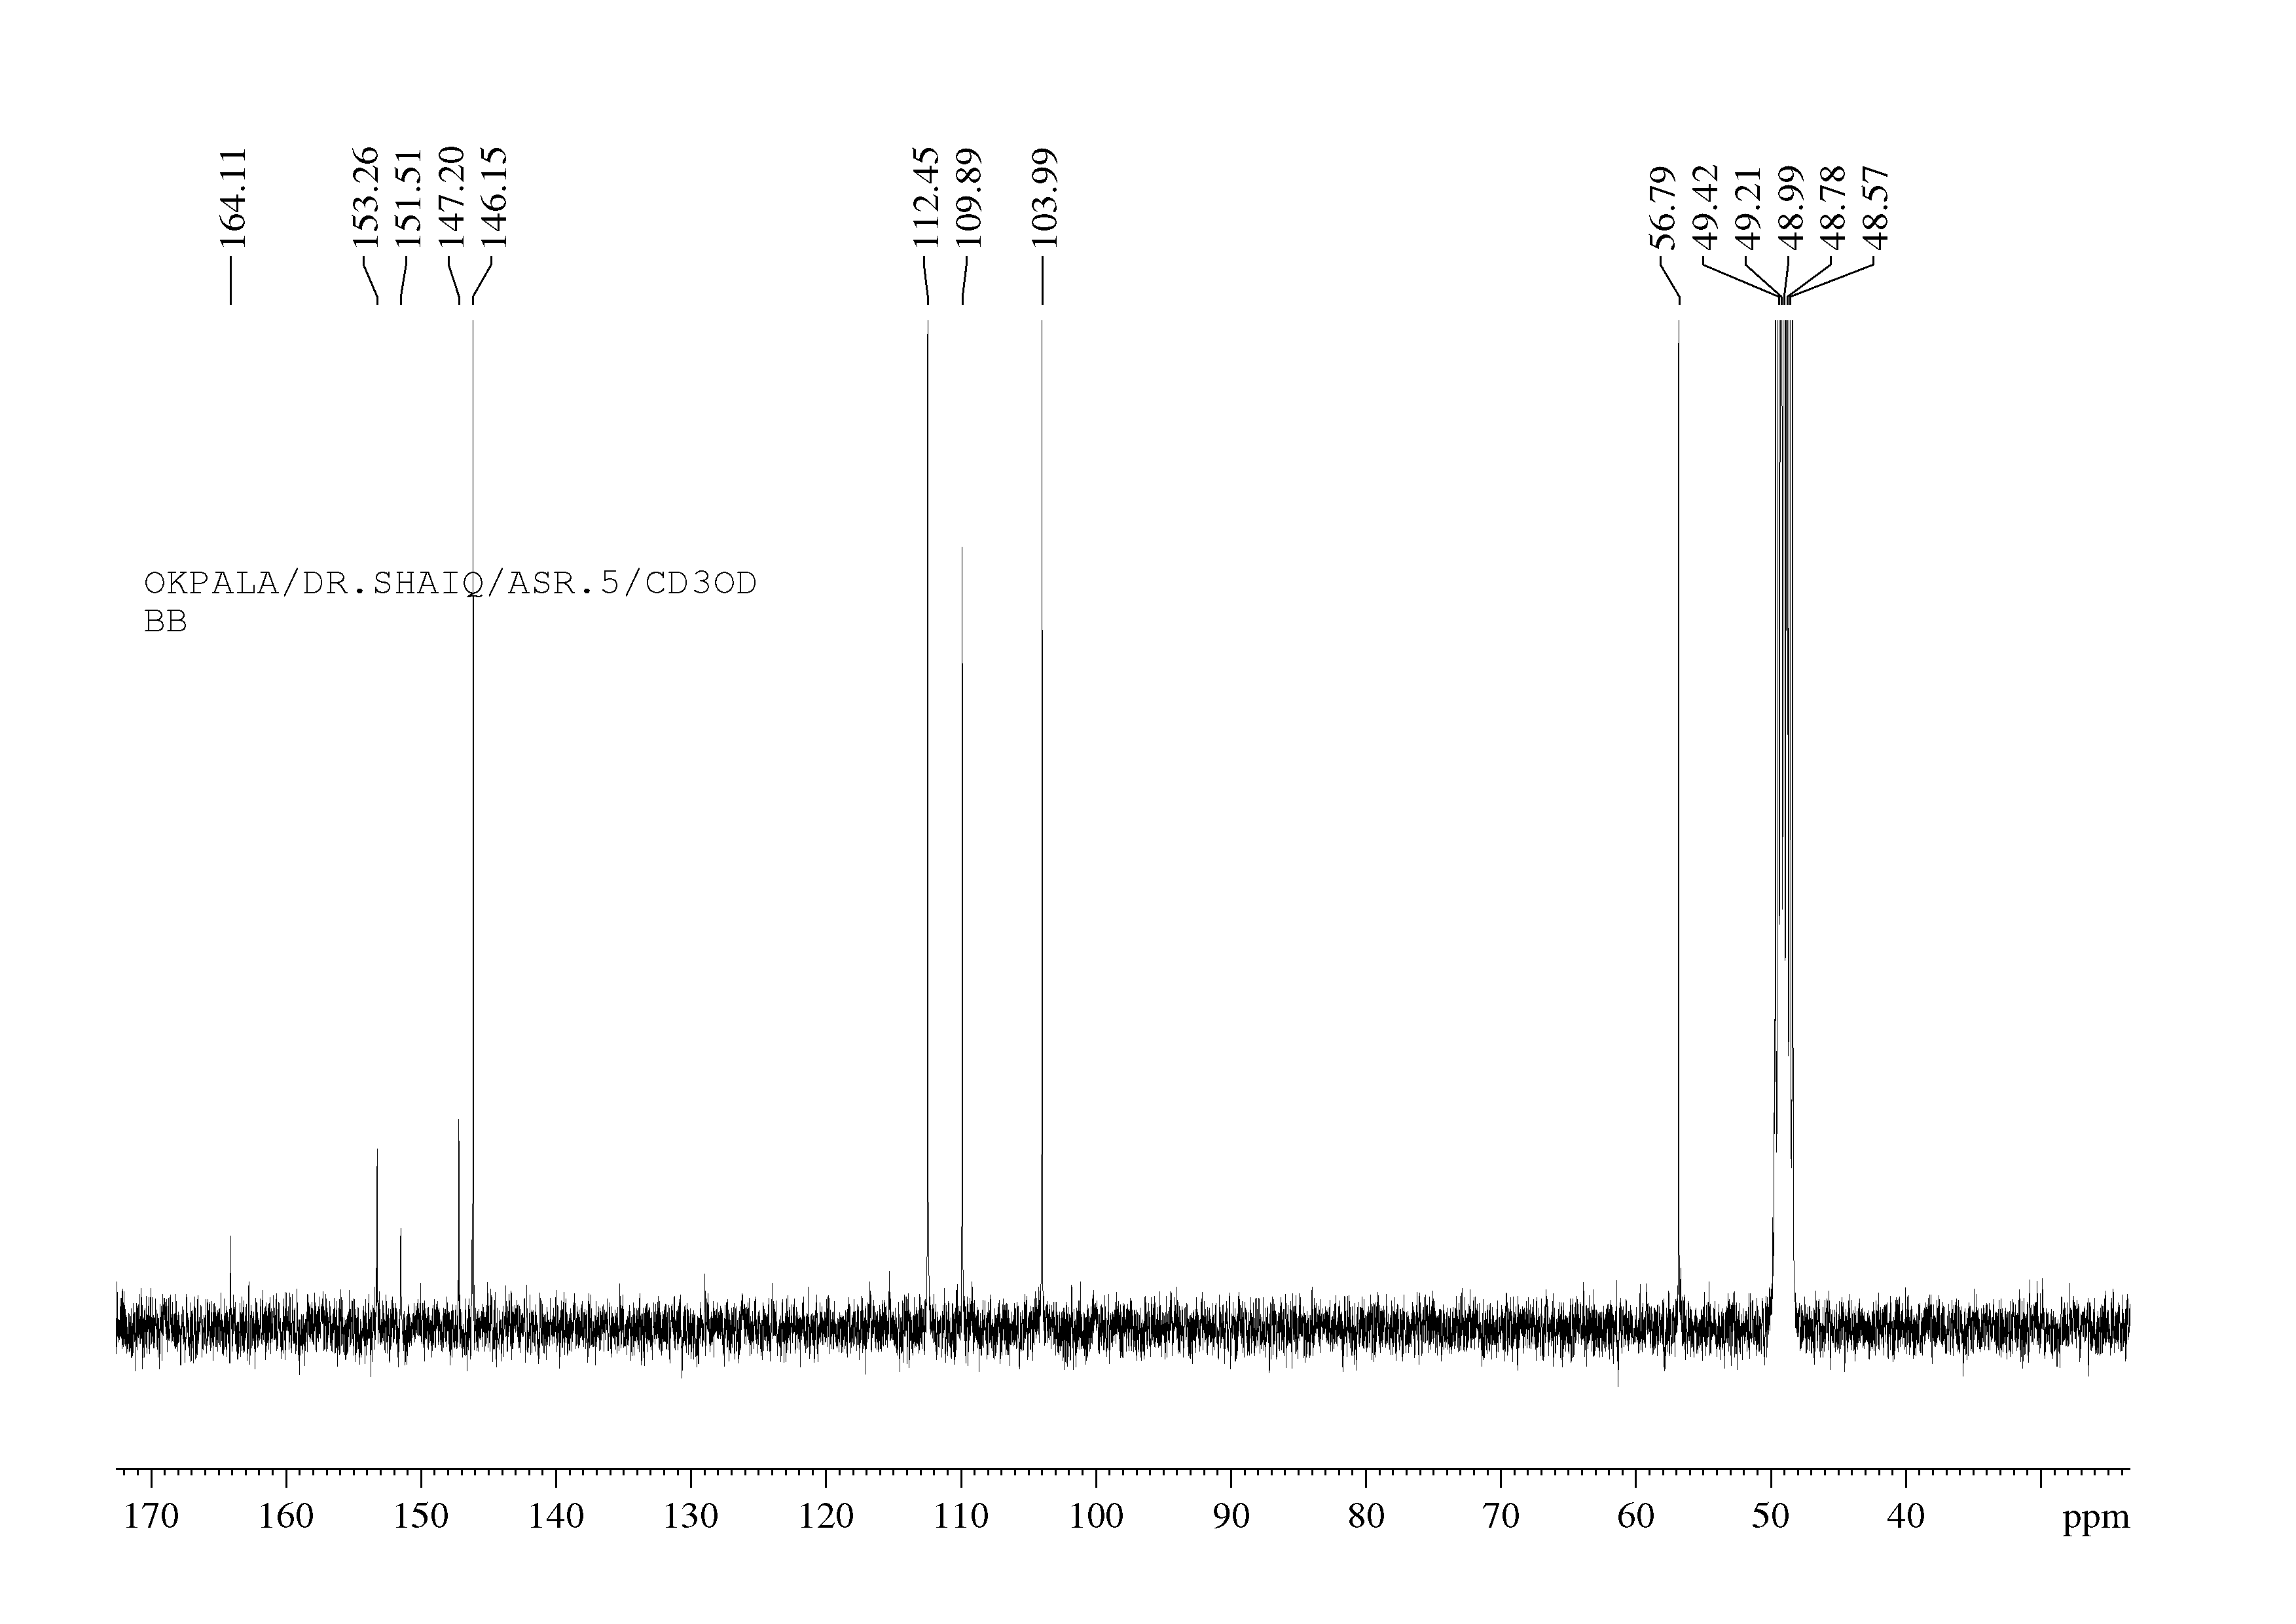


Fig. S23: DEPT 135 (CD3OD, 100MHz) spectrum of compound 3 (Scopoletin)


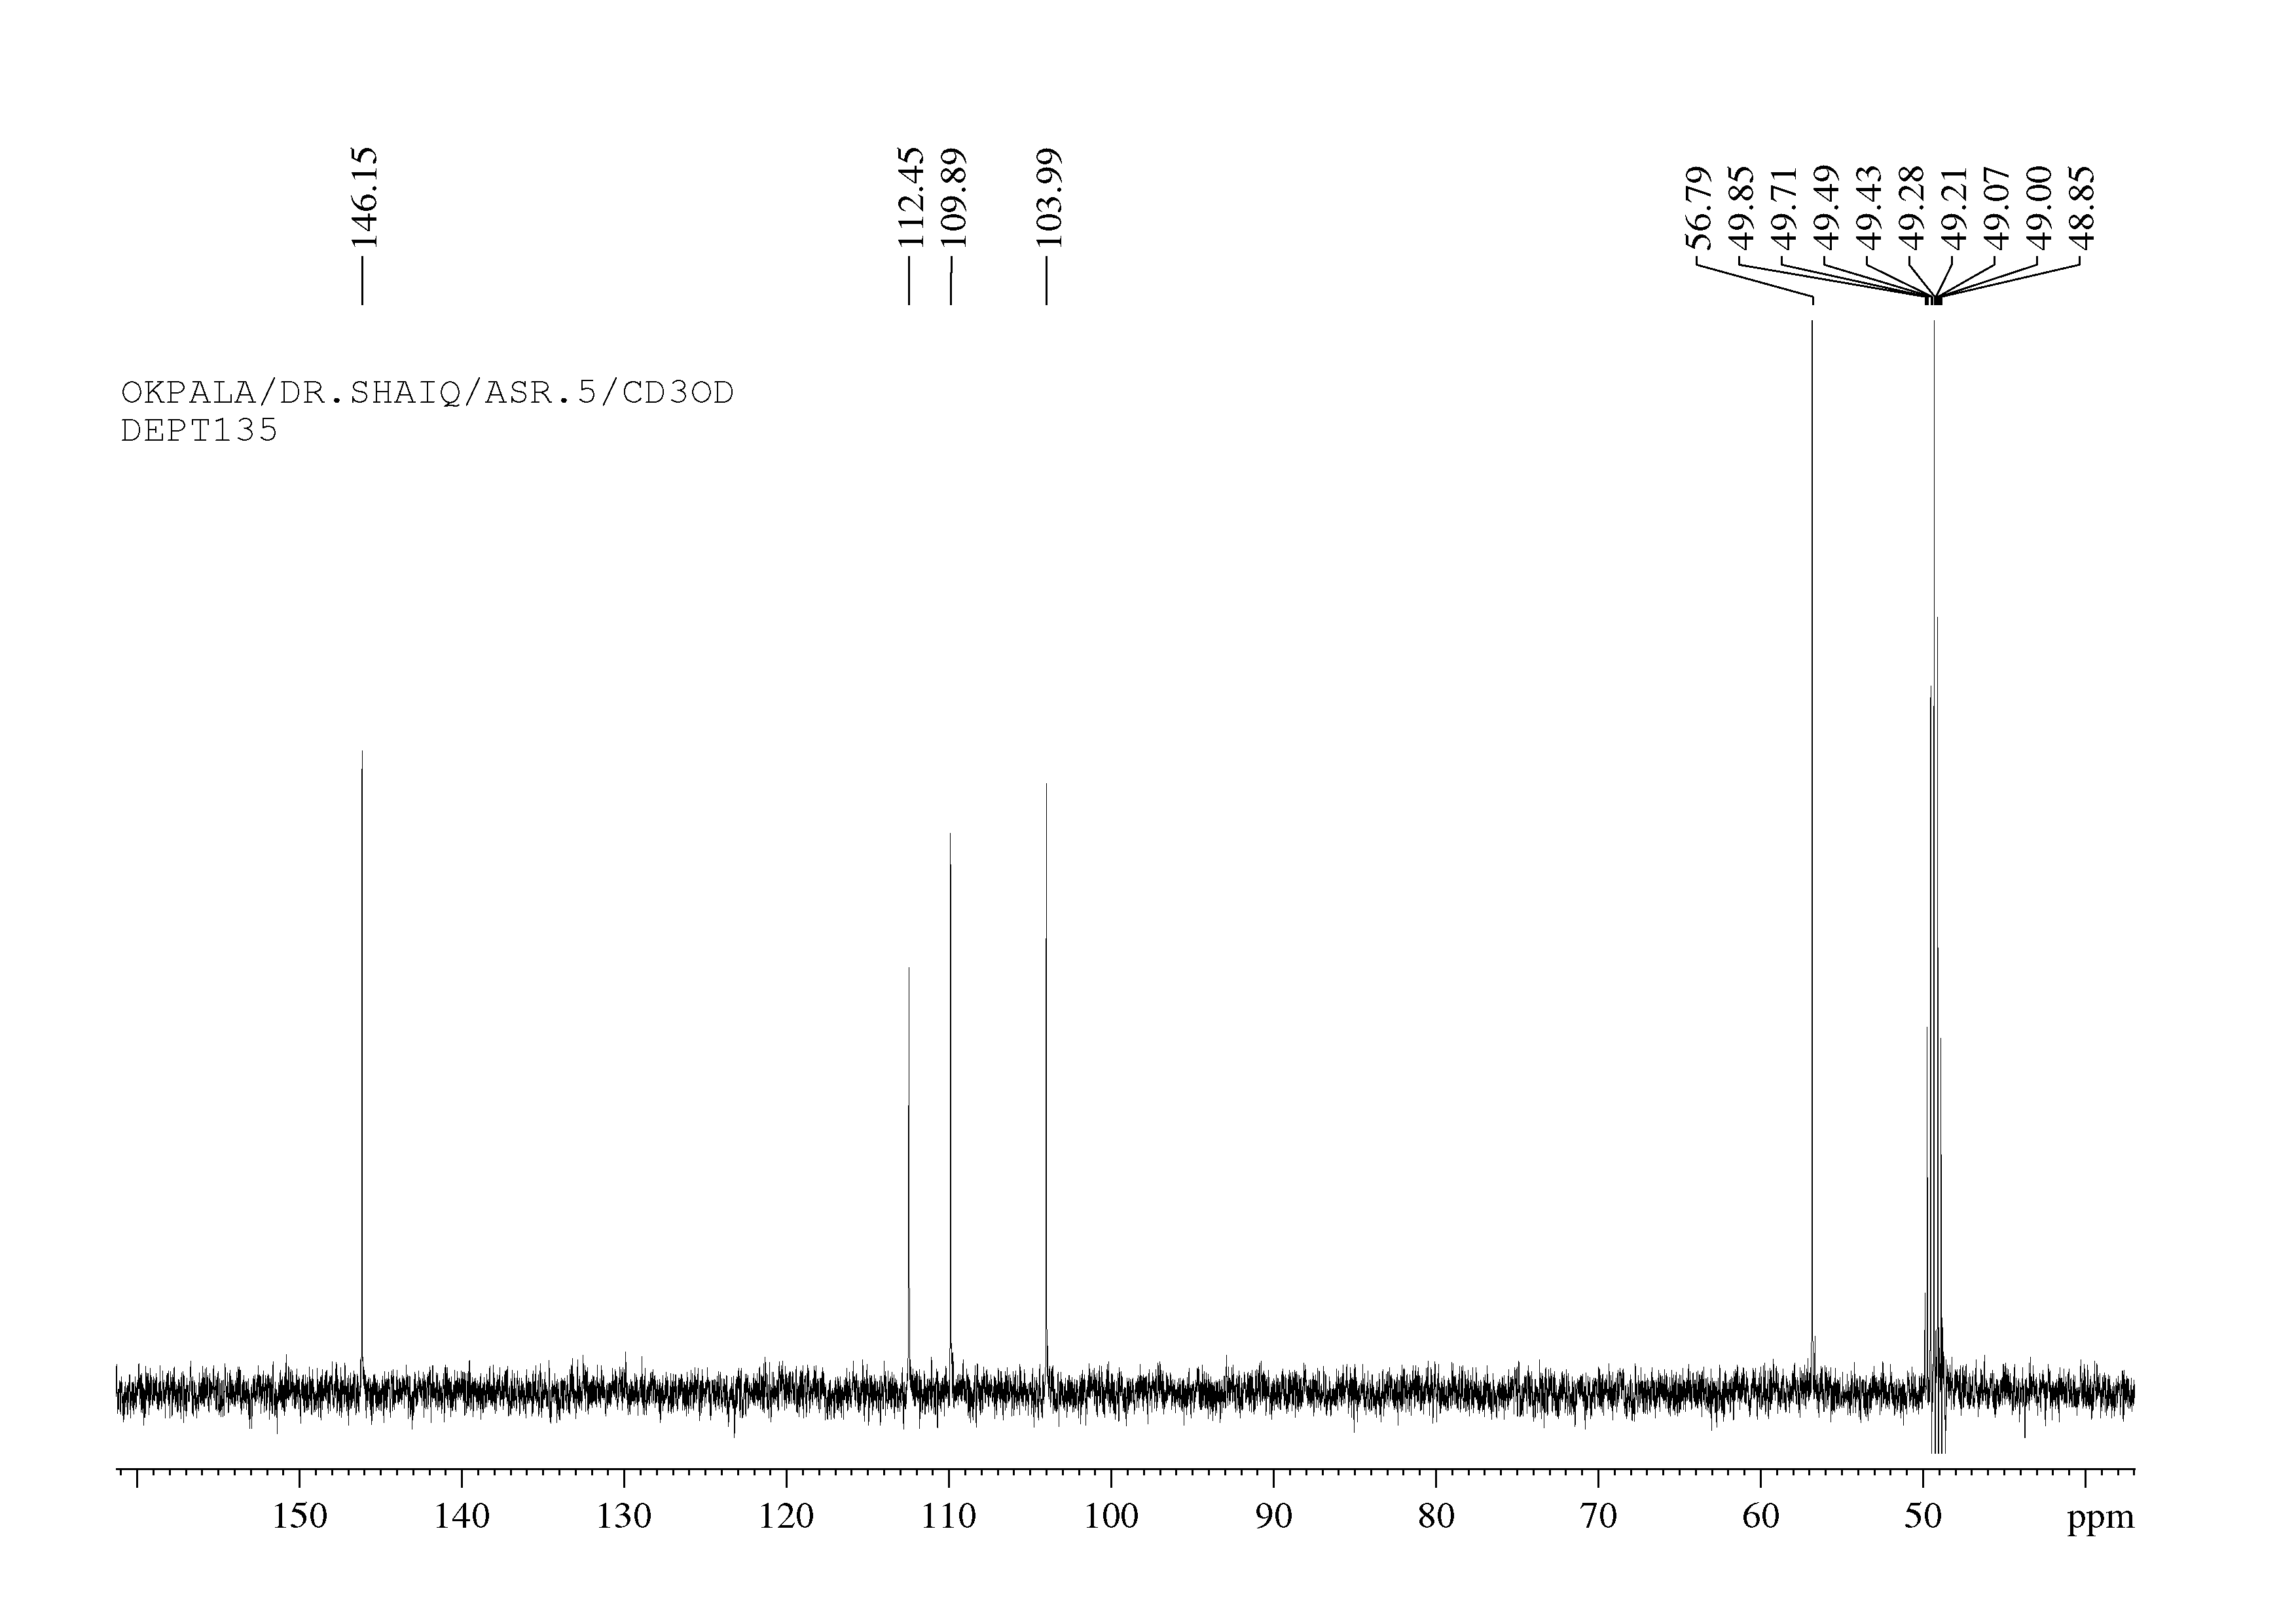


Fig. S24: DEPT 90 (CD3OD, 100MHz) spectrum of compound 3 (Scopoletin)


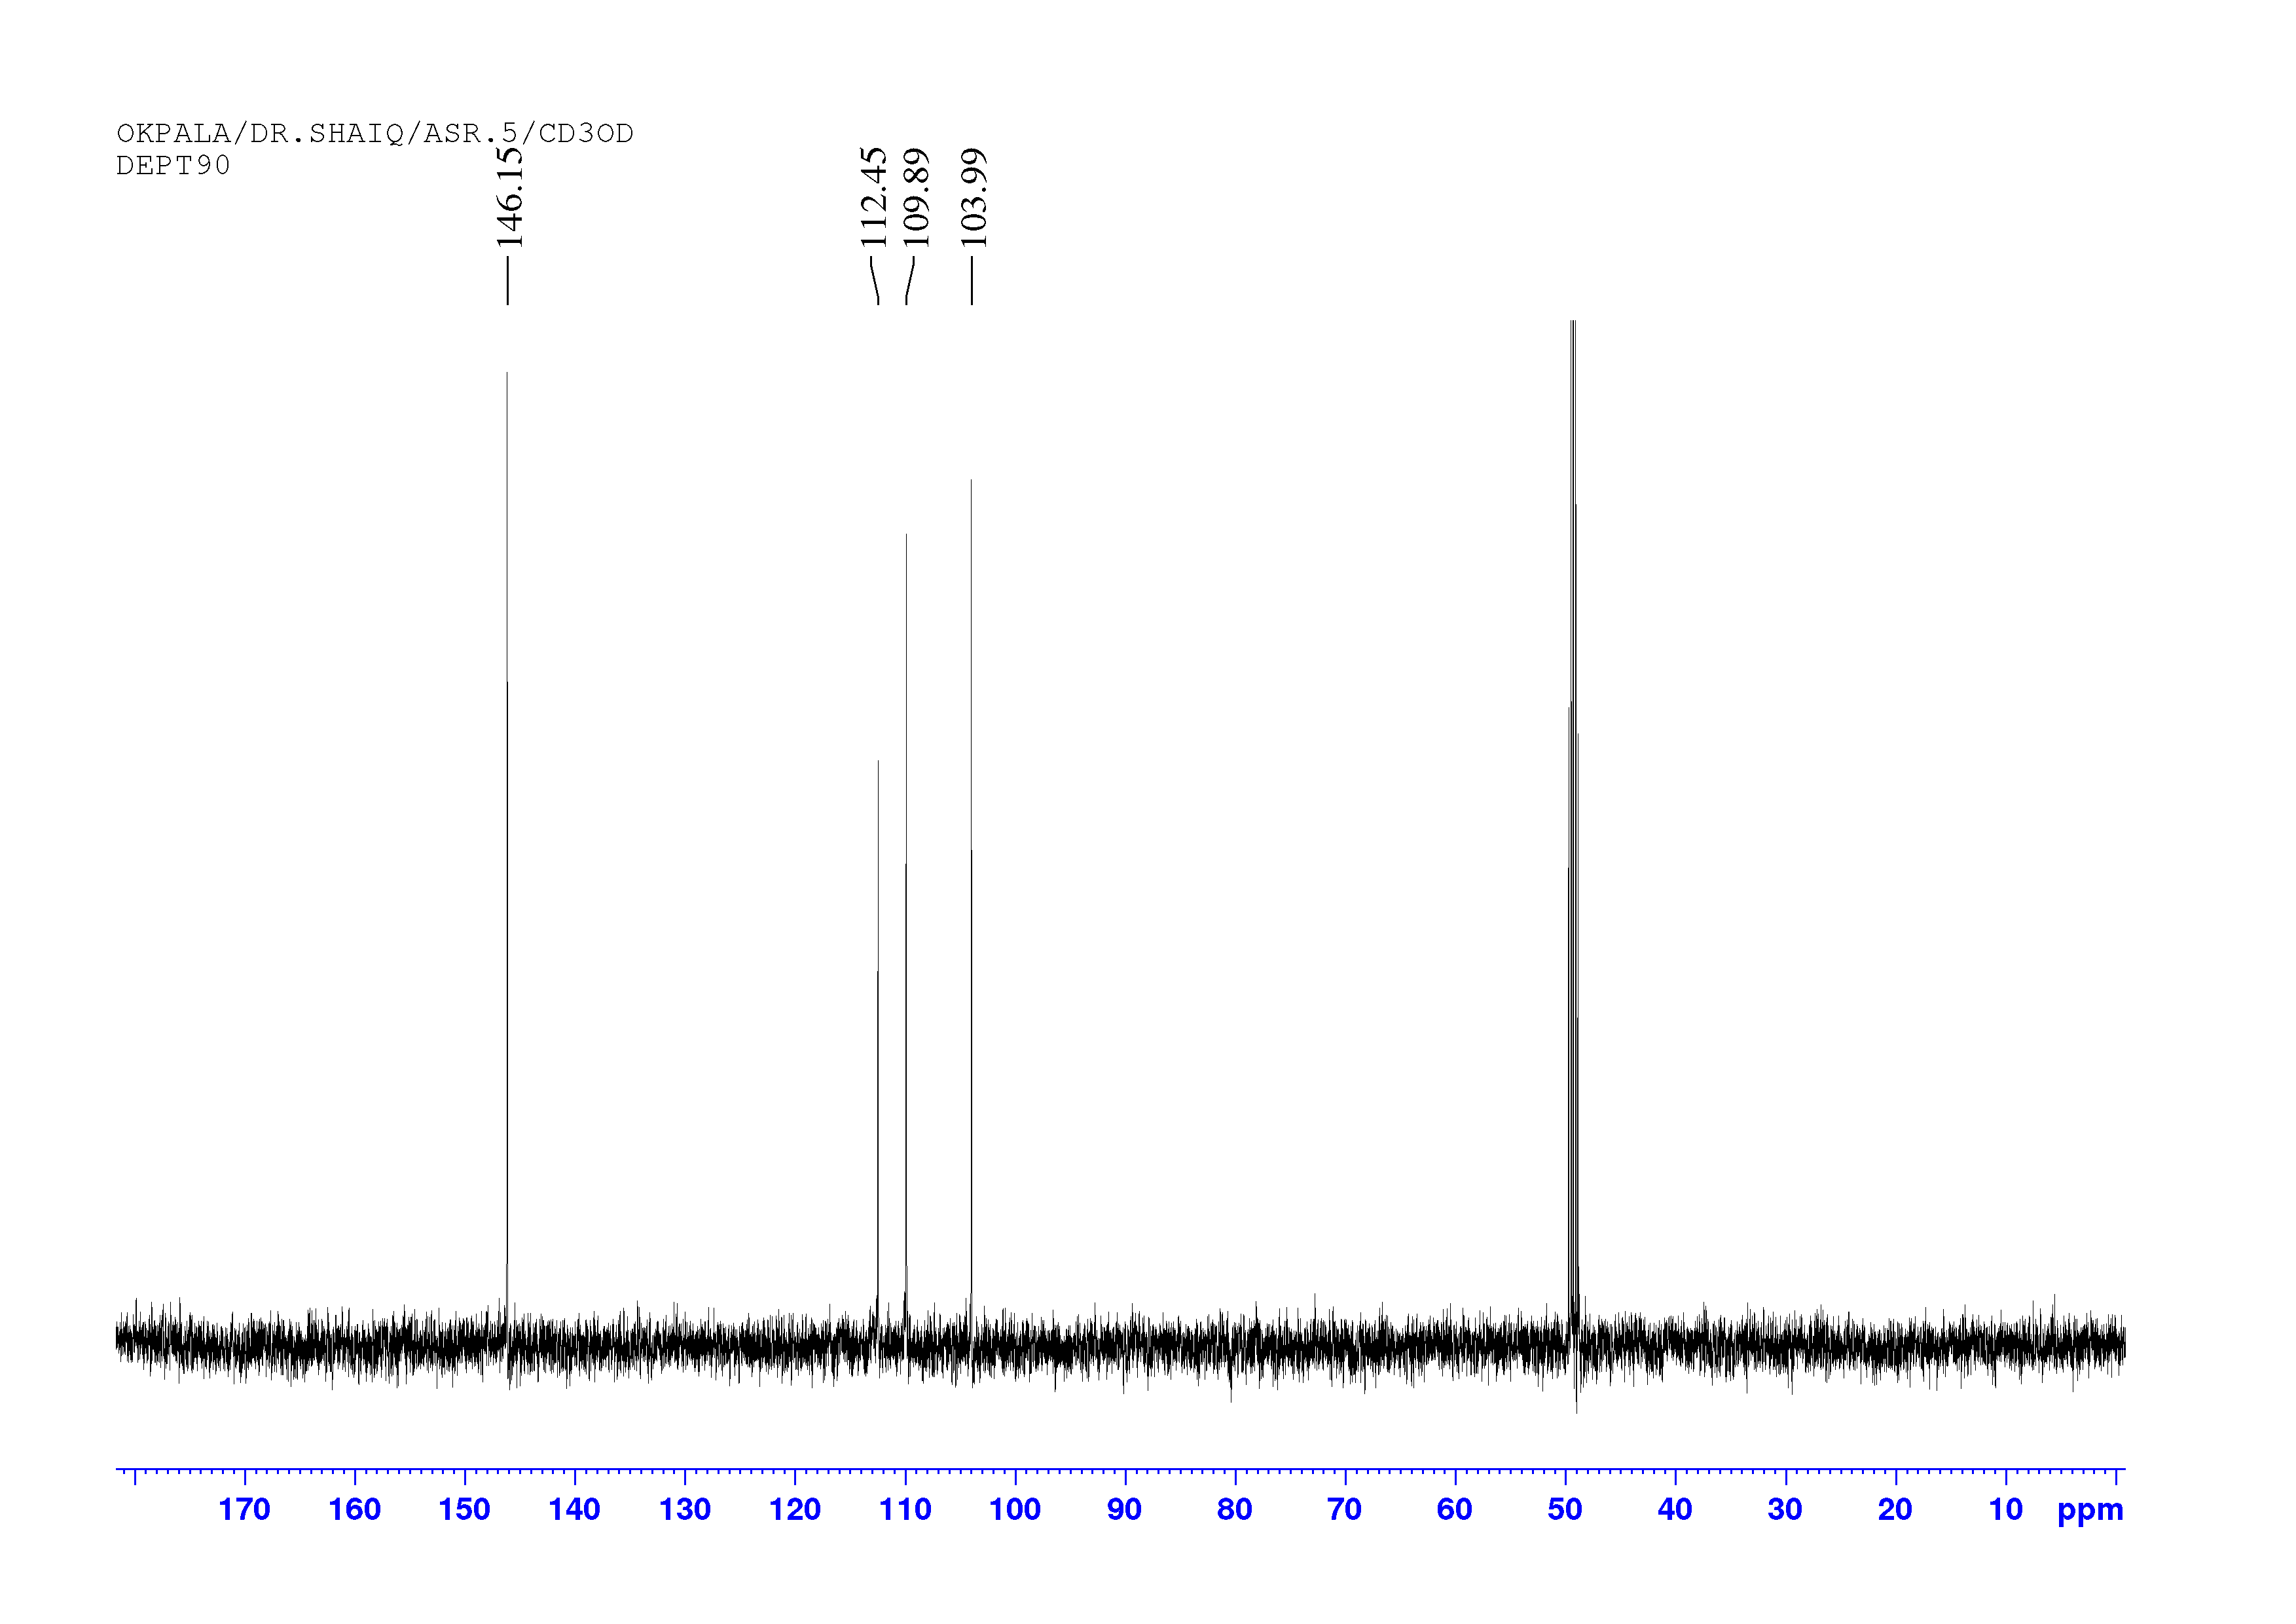


Fig. S25: COSY (CD3OD, 100MHz) spectrum of compound 3 (Scopoletin)

Fig. S26: HSQC (CD3OD, 100MHz) spectrum of compound 3 (Scopoletin)

Fig. S27: HMBC (CD3OD, 100MHz) spectrum of compound 3 (Scopoletin)

Fig. S28: Mass spectrum of compound 3 (Scopoletin)


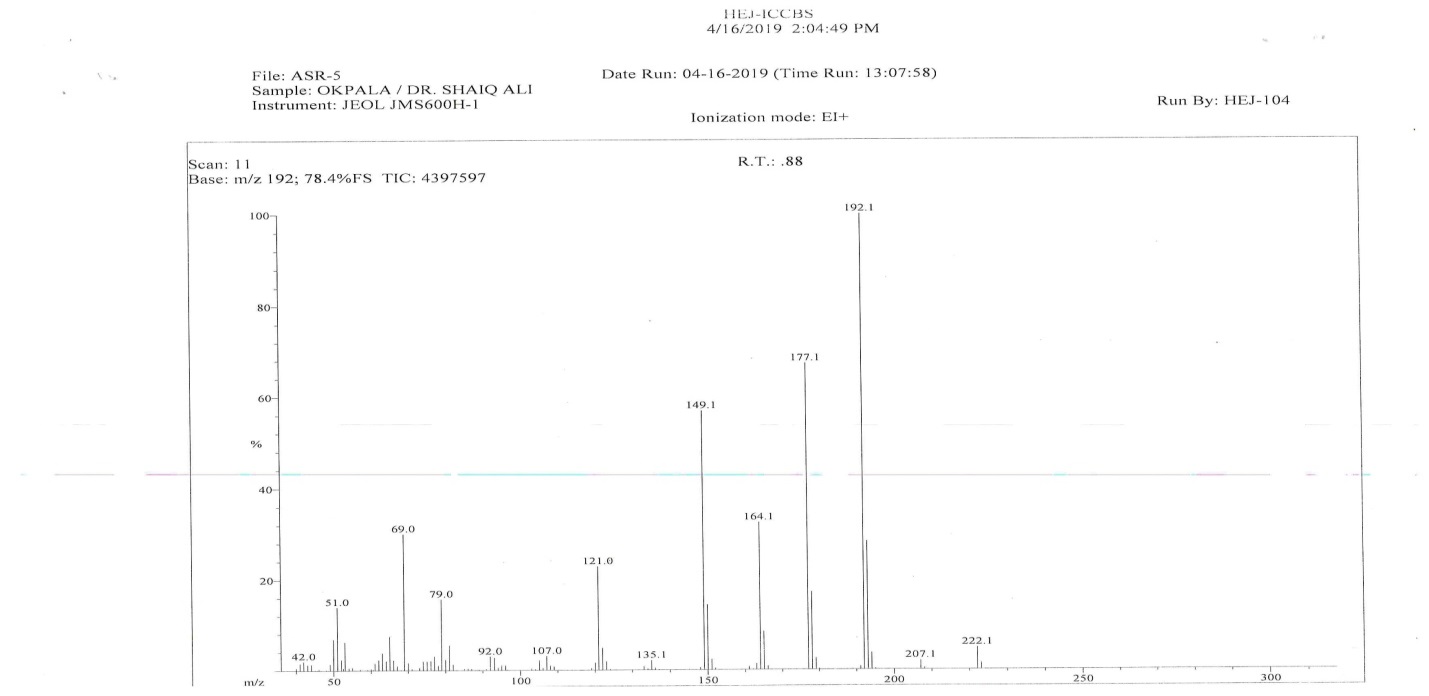


Fig. S29: IR spectrum of compound 3 (Scopoletin)


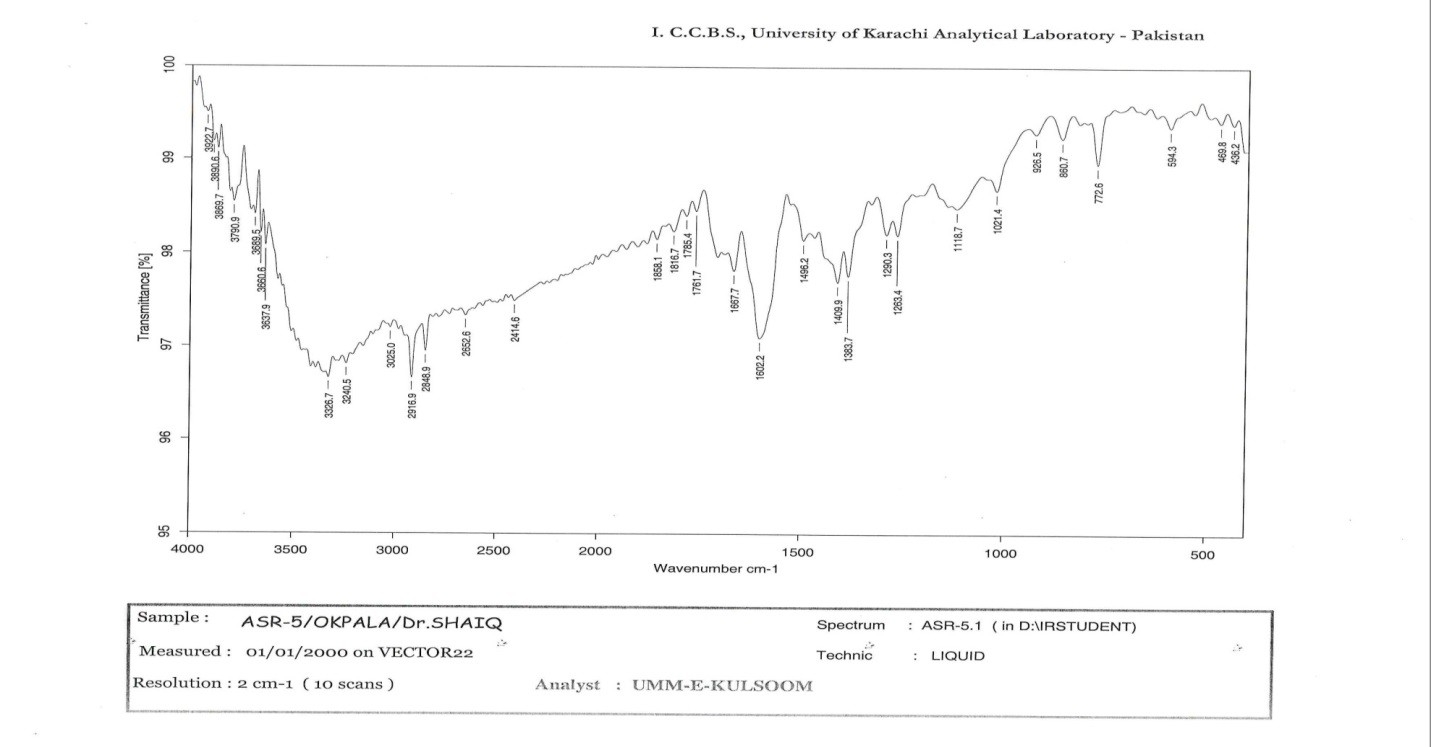


Fig. S30: UV spectrum compound 3 (Scopoletin)


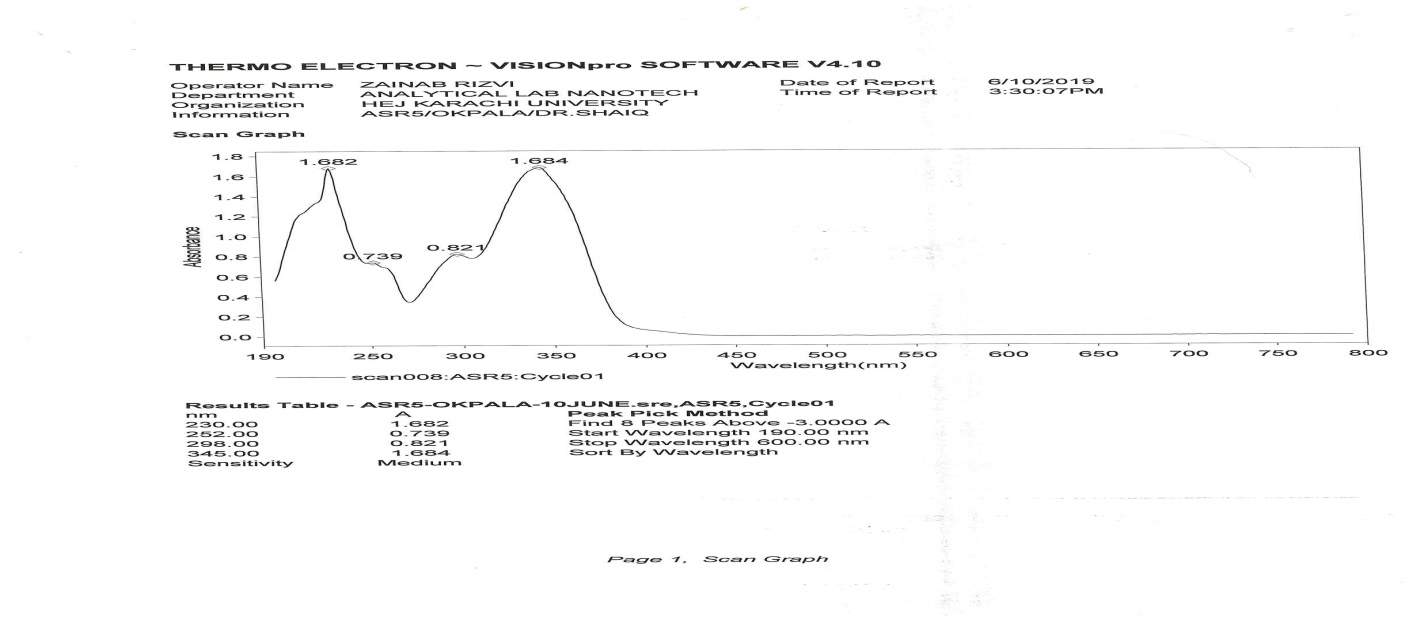


Fig. S31: 1H NMR (CDCl3, 400MHz) spectrum of compound 4


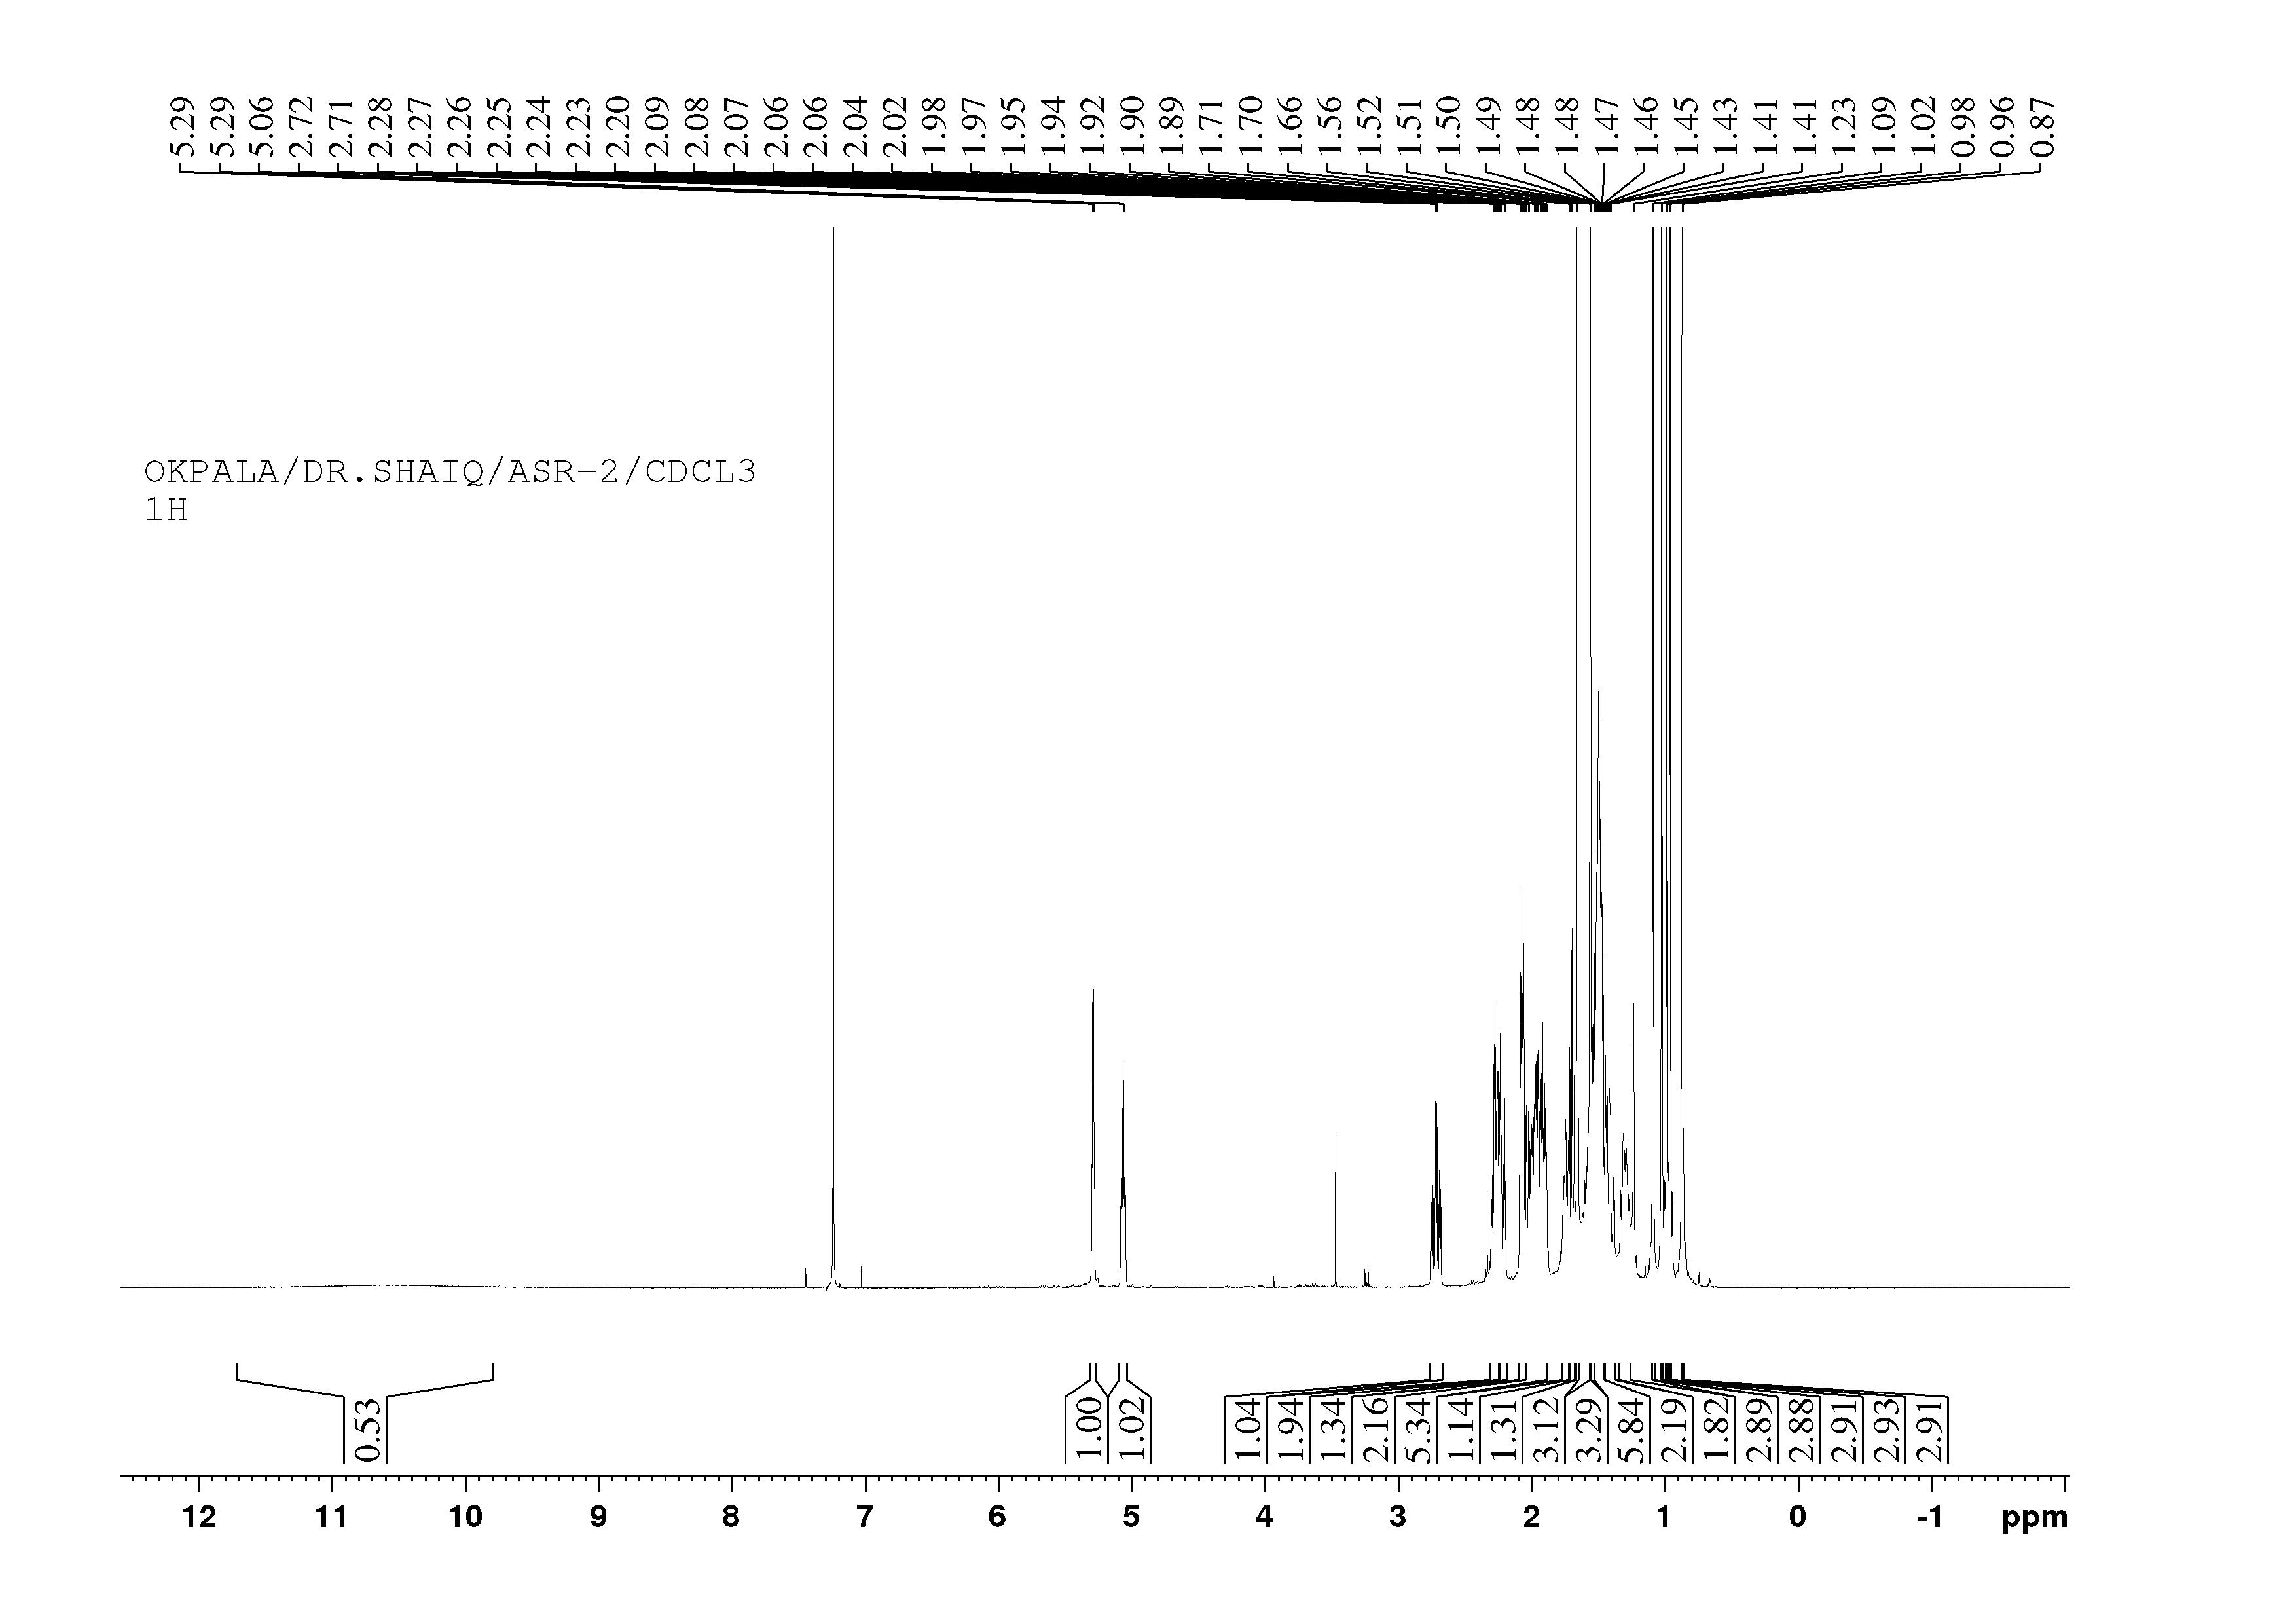


Fig. S32: 13C-NMR (CDCl3, 100MHz) spectrum of compound 4


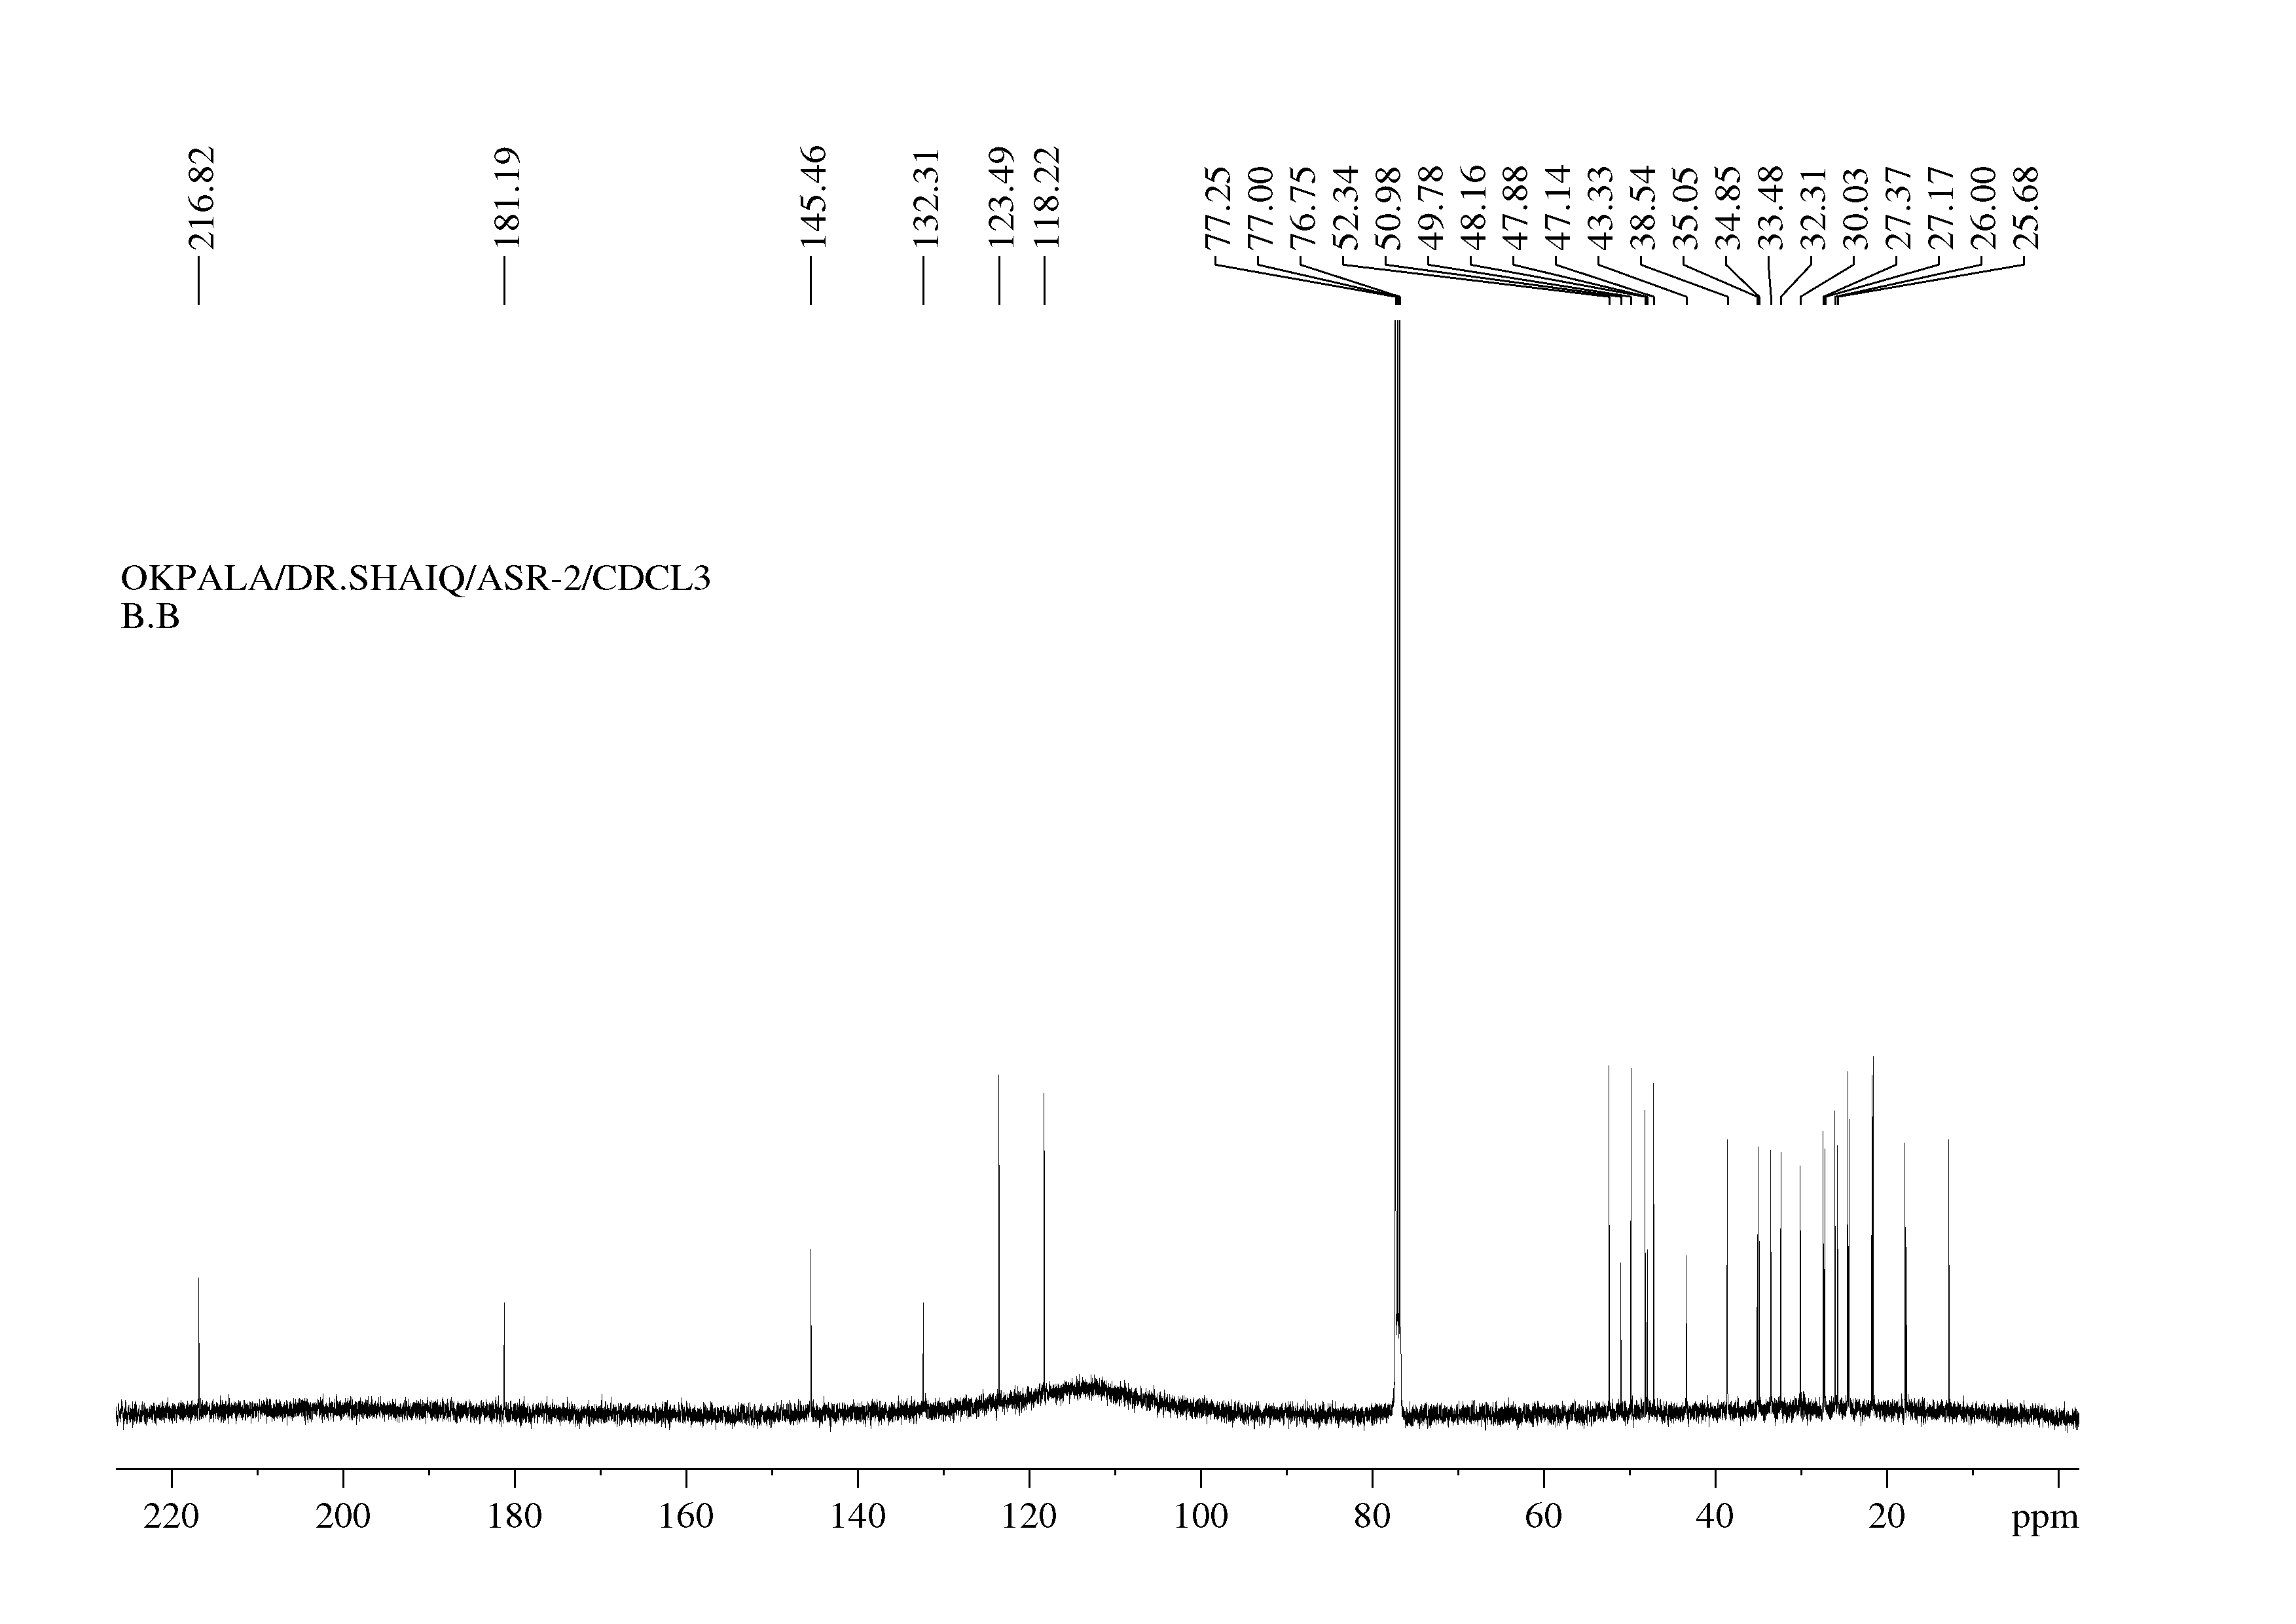


Fig. S33: DEPT 135 (CDCl3, 100MHz) spectrum of compound 4


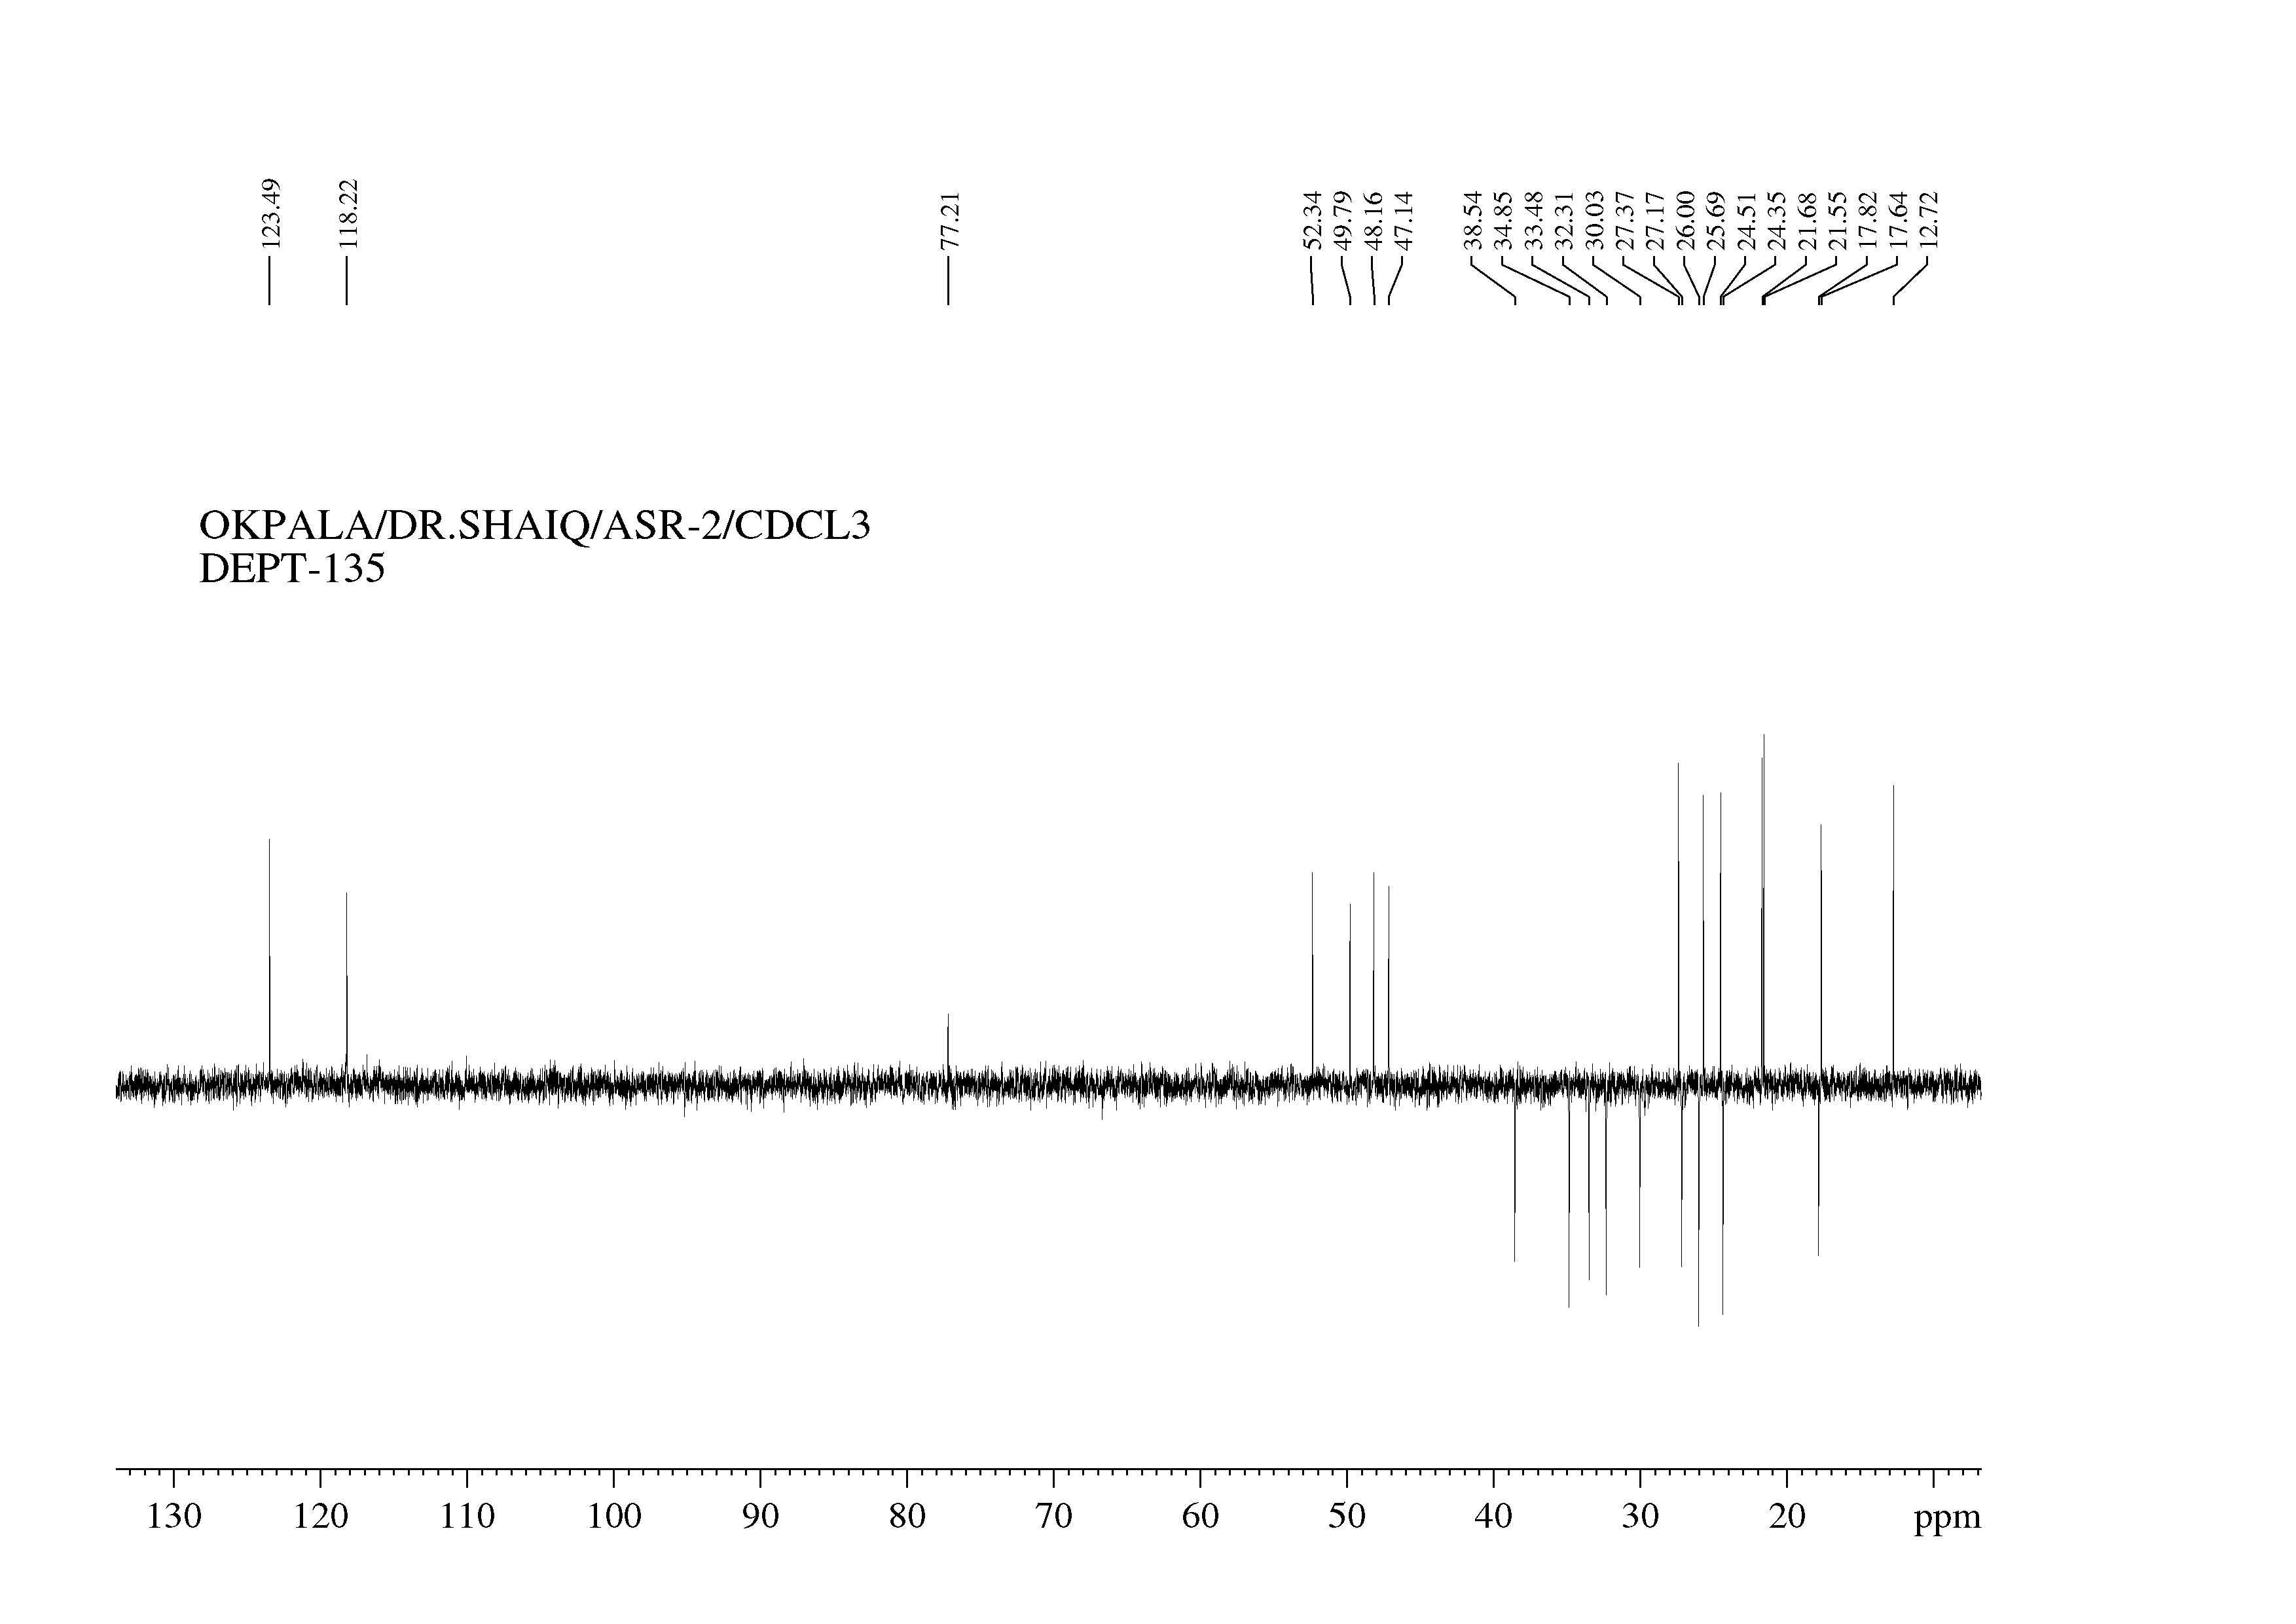


Fig. S34: DEPT 90 (CDCl3, 100MHz) spectrum of compound 4


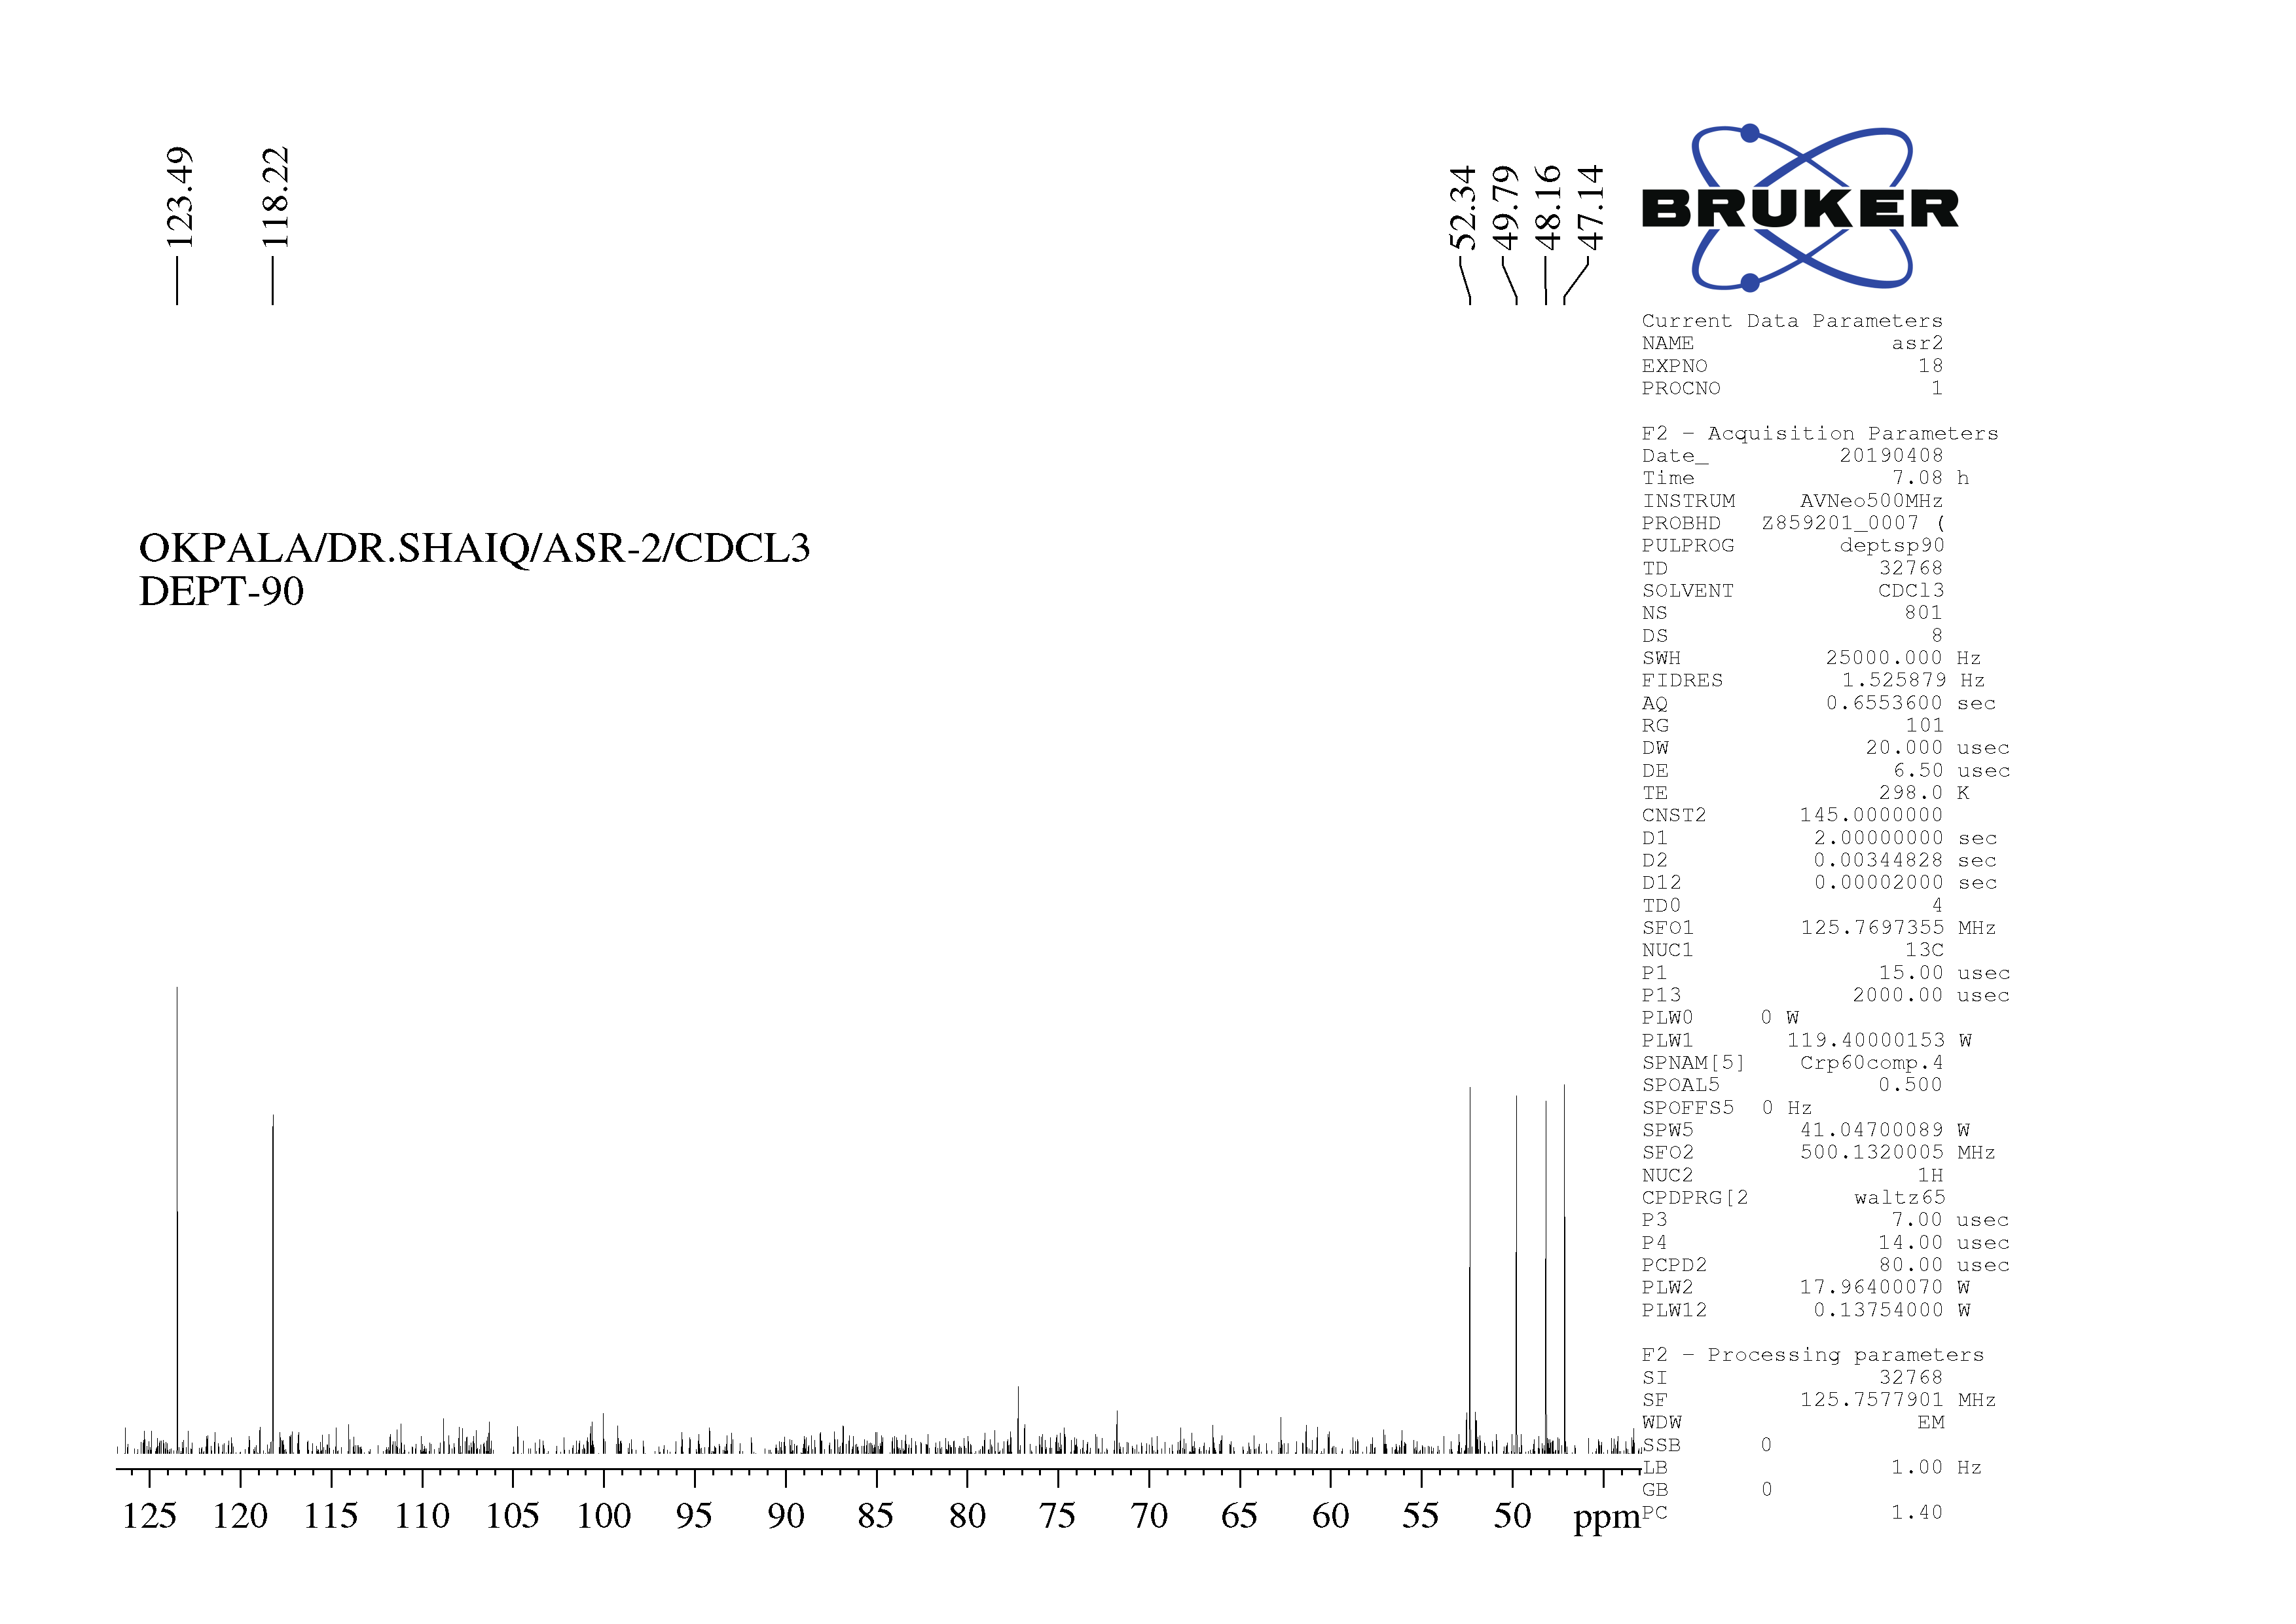


Fig. S35: HSQC (CDCl3, 100MHz) spectrum of compound 4

Fig. S36: HMBC (CDCl3, 100MHz) spectrum of compound 4

Fig. S37: Mass spectrum of compound 4


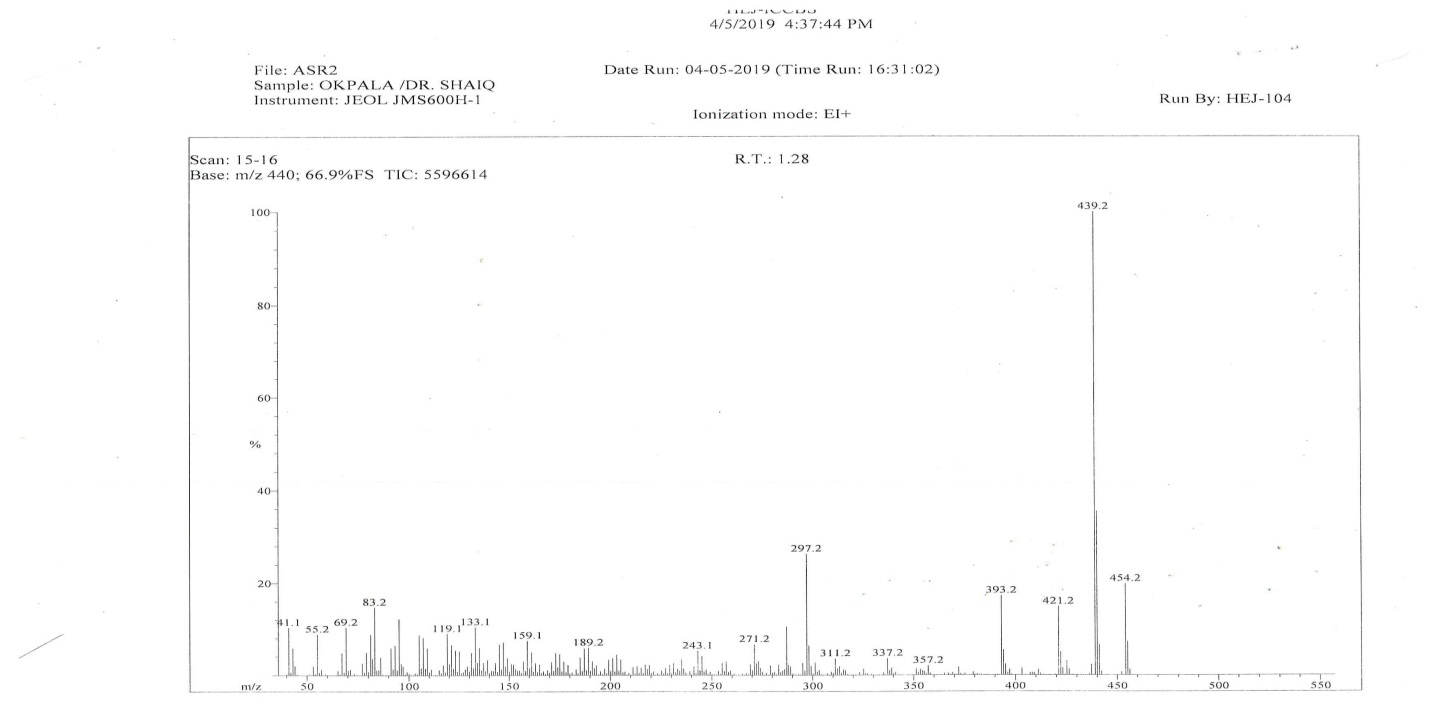


Fig. S38: IR spectrum of compound 4


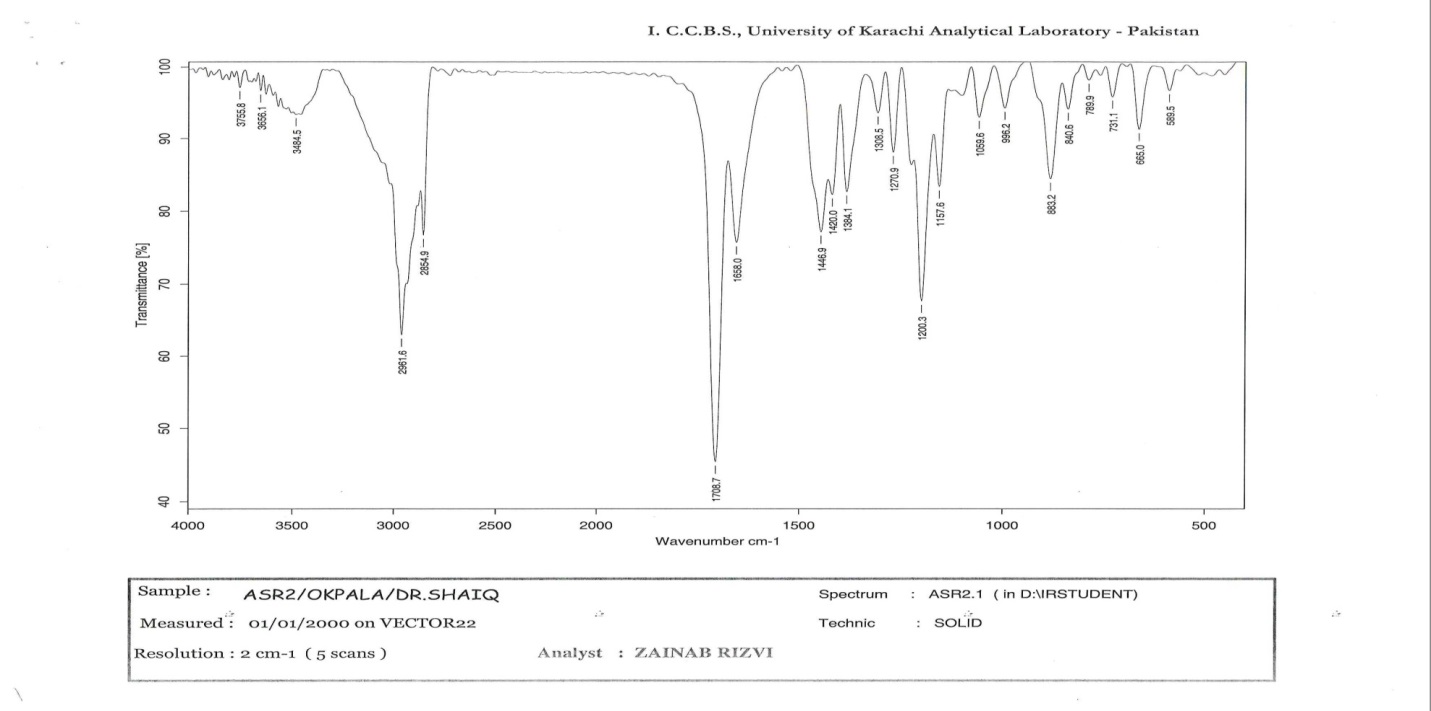

Supplement: Supplementary file 1 [file 42771543]
